# Supplementary material for: Substituent effects and electron delocalization in five-membered N-heterocycles
Source: Royal Society of Chemistry journal article supplement (doi:10.1039/d4cp01709a), 2024-01-01

# Supplementary Information

## Substituent effects and electron delocalization in five-membered N-heterocycles

Paweł A. Wieczorkiewicz<sup>1,\*</sup>, Tadeusz M. Krygowski<sup>2</sup>, Halina Szatyłowicz<sup>1,\*</sup>

<sup>1</sup> Faculty of Chemistry, Warsaw University of Technology, Noakowskiego 3, 00-664 Warsaw, Poland

<sup>2</sup> Department of Chemistry, University of Warsaw, Pasteura 1, 02-093 Warsaw, Poland

| Table of Contents                                                                                                                                                                                                                                                          | Page    |
|----------------------------------------------------------------------------------------------------------------------------------------------------------------------------------------------------------------------------------------------------------------------------|---------|
| <b>Computational details</b>                                                                                                                                                                                                                                               | S2-S3   |
| <b>Figure S1.</b> Relations between characteristics of five-membered N-heterocyclic rings and number of cyclically delocalized electrons, $EDDB_P(\pi)$ .                                                                                                                  | S4      |
| <b>Table S1.</b> Coefficients $a$ (slope) and $R^2$ of linear correlations between $EDDB_P(\pi)$ and $cSAR(X)$ presented in Figure 2.                                                                                                                                      | S4      |
| <b>Table S2.</b> Isosurfaces of $EDDB_P(\pi)$ function (0.02), representing the density of cyclically delocalized $\pi$ -electrons.                                                                                                                                        | S5-S16  |
| <b>Figure S2.</b> Relationships between $EDDB_P(\pi)$ and resonance substituent constant $R$ .                                                                                                                                                                             | S17     |
| <b>Figure S3.</b> Relations between lengths of bonds in the ring and resonance $R$ constants (left column) or the number of cyclically delocalized $\pi$ -electrons, $EDDB_P(\pi)$ (right column).                                                                         | S18-S24 |
| <b>Figure S4.</b> NBO analysis – natural hybrid orbital character of hybrids at ring atoms. Example – C4 substituted pyrazole derivatives (pyraC4).                                                                                                                        | S25     |
| <b>Table S3.</b> Crystallographic data found for monosubstituted compounds in CCSD.                                                                                                                                                                                        | S26     |
| <b>Figure S5.</b> $\pi$ -Orbital shapes independent of X substituent type.                                                                                                                                                                                                 | S27     |
| <b>Table S4.</b> Isosurfaces of $EDDB_{G-P}$ function (0.02 electrons) – a visual representation of non-cyclic electron delocalization.                                                                                                                                    | S27-S38 |
| <b>Table S5.</b> Values of $cSAR(X)$ for $NO_2$ , Cl and $NH_2$ substituents, the number of inductive and resonance interactions between substituent and endocyclic N atoms in each heterocycle and resonance structures associated with resonance effect of substituents. | S39     |
| <b>Table S6.</b> Values of $cSAR(X)$ of $NO_2$ , Cl and $NH_2$ substituents in derivatives of selected six-membered heterocycles.                                                                                                                                          | S40     |
| <b>Figure S6.</b> Relations between geometric aromaticity indices and the number of cyclically delocalized electrons from the $EDDB_P(\pi)$ function.                                                                                                                      | S40     |
| <b>Figure S7.</b> Non covalent interaction analysis (NCI method). Reduced density gradient isosurfaces (RDG = 0.5), colored according to the value of $sgn(\lambda_2(r)) \cdot \rho(r)$ .                                                                                  | S41-S42 |
| <b>Table S7.</b> Keto, thioketo and imino forms of studied five-membered heterocycles with their $EDDB_P(\pi)$ , $cSAR(X)$ , HOMED, CX bond lengths ( $d_{CX}$ ) and $\Delta E$ values (in kcal/mol).                                                                      | S42     |
| <b>Figure S8.</b> Anisotropy of the induced current density (AICD) plots and $EDDB_P$ isosurfaces (0.02) for enol and keto forms of substituted imidazole and pyrazole.                                                                                                    | S43     |
| <b>Figure S9.</b> Correlation between the number of cyclically delocalized electrons and electron withdrawing properties of $=NH/=O/=S$ groups for all studied heterocycles.                                                                                               | S44     |
| <b>Figure S10.</b> Energies of HOMO, LUMO and the HOMO–LUMO gap ( $\Delta H-L$ ) as a function of $cSAR(X)$ .                                                                                                                                                              | S44-S46 |
| <b>Table S8.</b> Summary of slopes from Figure S10.                                                                                                                                                                                                                        | S46     |
| <b>Table S9.</b> Reference bonds lengths (Å) calculated at revDSD–PBEP86–G3BJ/def2–TZVPP level of theory and values of HOMED normalization constants $\alpha$ .                                                                                                            | S46     |
| <b>Table S10.</b> AICD plots (isosurface = 0.03) of selected substituted and unsubstituted systems.                                                                                                                                                                        | S47-50  |

## Computational details

Geometry optimizations and all electronic structure calculations were performed using DFT with double-hybrid functional at revDSD-PBEP86-G3BJ/def2-TZVPP level of theory<sup>1,2</sup> (tight convergence criteria, UltraFine grid) in Gaussian 16 C.01 program.<sup>3</sup> This functional is one of the most accurate DFT methods as tested in several benchmarks.<sup>1</sup> Vibrational frequencies calculations were performed to confirm that each optimized geometry correspond to the minimum on the potential energy surface. Natural orbital calculations were performed using NBO 7 software.<sup>4</sup>

EDDB is a method which allows a very detailed analysis of electron delocalization directly from the information encoded in the wavefunction. In EDDB the total electron density is decomposed into the densities of electrons localized at atoms (core electrons, lone pairs), localized at chemical bonds, and delocalized between several bonds. The last density is called electron density of delocalized bonds (EDDB), from which the method takes its name. Full theory on how decomposition is performed we refer the readers to the cited articles.<sup>5-8</sup>

The EDDB can be further decomposed into contributions from different delocalization types. EDDB<sub>G</sub> (G - global) contains all delocalized electrons, EDDB<sub>H</sub> excludes the contribution from bonds with H atoms, while EDDB<sub>P</sub> contains only electrons delocalized in cyclic Kekulean pathway (excluding cross-ring delocalization associated in benzene with Dewar forms). Each of the delocalization types can be quantitatively analyzed in terms of contributions from electrons of  $\sigma$ ,  $\pi$  and other orbital symmetries. Hence, in this paper, EDDB<sub>P</sub>( $\pi$ ) are the cyclically delocalized  $\pi$  electrons. The delocalized electron density grids can be visualized in the form of isosurfaces and subtracted from each other. For example, EDDB<sub>G-P</sub> = EDDB<sub>G</sub> – EDDB<sub>P</sub> function is the global electron density minus the cyclically delocalized electron density, in other words, it is a density of non-cyclically delocalized electrons. All EDDB calculations were performed using the density matrices in the NBO basis. EDDB grids were generated in cubegen subprogram available within Gaussian 16 C.01.

HOMA<sup>9,10</sup> and HOMED<sup>11,12</sup> geometric aromaticity indices were calculated from Equation 1:

$$\text{HOMA, HOMED} = 1 - \frac{1}{n} \sum_j^n \alpha_j (d_{o,j} - d_j)^2 \quad (1)$$

where  $n$  is the number of bonds in considered fragment,  $\alpha_j$  is the normalization constant for  $j$  bond, for HOMA tabularized (but can also be calculated for specific computational level, Equation 2).

$$\alpha_j = 2\{(d_o - d_s)^2 + (d_o - d_d)^2\}^{-1} \quad (2)$$

For HOMED, if the number of bonds considered is even, Equation 1 is also used. However, if the fragment has odd number of bonds,  $\alpha_j$  in HOMED is calculated from Equations 3 or 4:

for a system with  $i$  double bonds and  $i+1$  single bonds:

$$\alpha_j = (2i + 1) \cdot \{(i + 1)(d_o - d_s)^2 + i(d_o - d_d)^2\}^{-1} \quad (3)$$

for a system with  $i+1$  double bonds and  $i$  single bonds:

$$\alpha_j = (2i + 1) \cdot \{i(d_o - d_s)^2 + (i + 1)(d_o - d_d)^2\}^{-1} \quad (4)$$

In this paper HOMA was calculated using standard parameters,<sup>10</sup> while HOMED was parametrized at revDSD-PBEP86-G3BJ/def2-TZVPP level of theory, using reference systems proposed by Raczynska.<sup>11</sup> The reference

bond lengths are provided in the Table S9. Calculation of HOMA and HOMED values, as well as EDDB grid subtraction was performed in Multiwfn program.<sup>13</sup>

Anisotropy of the induced current density (AICD)<sup>14</sup> maps were generated using Gaussian and AICD 3.03 program at B3LYP/6-311+G(d,p), NMR=CSGT, with contribution of all orbitals.

Electron donating and withdrawing properties were assessed using the cSAR method. cSAR of substituent X is calculated from Equation 5:

$$\text{cSAR}(X) = q(X) + q(\textit{ipso}) \quad (5)$$

where  $q(X)$  is the sum of charges at all atoms of X, and  $q(\textit{ipso})$  is the charge at the *ipso* atom of the substituted system, the atom to which X is attached. In this paper, Hirshfeld atomic charges were used.<sup>15</sup>

## References

- 1 G. Santra, N. Sylvetsky and J. M. L. Martin, *J. Phys. Chem. A*, 2019, **123**, 5129–5143.
- 2 F. Weigend and R. Ahlrichs, *Phys. Chem. Chem. Phys.*, 2005, **7**, 3297.
- 3 M. J. Frisch, G. W. Trucks, H. B. Schlegel, G. E. Scuseria, M. A. Robb, J. R. Cheeseman, G. Scalmani, V. Barone, G. A. Petersson, H. Nakatsuji, X. Li, M. Caricato, A. V. Marenich, J. Bloino, B. G. Janesko, R. Gomperts, B. Mennucci, H. P. Hratchian, J. V. Ortiz, A. F. Izmaylov, J. L. Sonnenberg, Williams, F. Ding, F. Lipparini, F. Egidi, J. Goings, B. Peng, A. Petrone, T. Henderson, D. Ranasinghe, V. G. Zakrzewski, J. Gao, N. Rega, G. Zheng, W. Liang, M. Hada, M. Ehara, K. Toyota, R. Fukuda, J. Hasegawa, M. Ishida, T. Nakajima, Y. Honda, O. Kitao, H. Nakai, T. Vreven, K. Throssell, J. A. Montgomery Jr., J. E. Peralta, F. Ogliaro, M. J. Bearpark, J. J. Heyd, E. N. Brothers, K. N. Kudin, V. N. Staroverov, T. A. Keith, R. Kobayashi, J. Normand, K. Raghavachari, A. P. Rendell, J. C. Burant, S. S. Iyengar, J. Tomasi, M. Cossi, J. M. Millam, M. Klene, C. Adamo, R. Cammi, J. W. Ochterski, R. L. Martin, K. Morokuma, O. Farkas, J. B. Foresman and D. J. Fox, Gaussian 16 Rev. C.01 2016.
- 4 Glendening, E. D., Badenhoop, J. K., Reed, A. E., Carpenter, J. E., Bohmann, J. A., Morales, C. M., Karafiloglou, P., Landis, C. R., and Weinhold, F., NBO 7.0 Theoretical Chemistry Institute, University of Wisconsin, Madison 2018.
- 5 D. W. Szczepanik, M. Andrzejak, K. Dyduch, E. Żak, M. Makowski, G. Mazur and J. Mrozek, *Phys. Chem. Chem. Phys.*, 2014, **16**, 20514–20523.
- 6 D. W. Szczepanik, *Comput. Theor. Chem.*, 2016, **1080**, 33–37.
- 7 D. W. Szczepanik, M. Andrzejak, J. Dominikowska, B. Pawełek, T. M. Krygowski, H. Szatyłowicz and M. Solà, *Phys. Chem. Chem. Phys.*, 2017, **19**, 28970–28981.
- 8 D. W. Szczepanik and M. Solà, in *Aromaticity*, Elsevier, 2021, pp. 259–284.
- 9 J. Kruszewski and T. M. Krygowski, *Tetrahedron Lett.*, 1972, **13**, 3839–3842.
- 10 T. M. Krygowski, *J. Chem. Inf. Comput. Sci.*, 1993, **33**, 70–78.
- 11 E. Raczyńska, *Symmetry*, 2019, **11**, 146.
- 12 E. D. Raczyńska, M. Hallman, K. Kolczyńska and T. M. Stępniewski, *Symmetry*, 2010, **2**, 1485–1509.
- 13 T. Lu and F. Chen, *J. Comput. Chem.*, 2012, **33**, 580–592.
- 14 Geuenich, D.; Hess, K.; Köhler, F.; Herges, R. *Chem. Rev.* **2005**, *105* (10), 3758–3772
- 15 F. L. Hirshfeld, *Theoret. Chim. Acta*, 1977, **44**, 129–138.

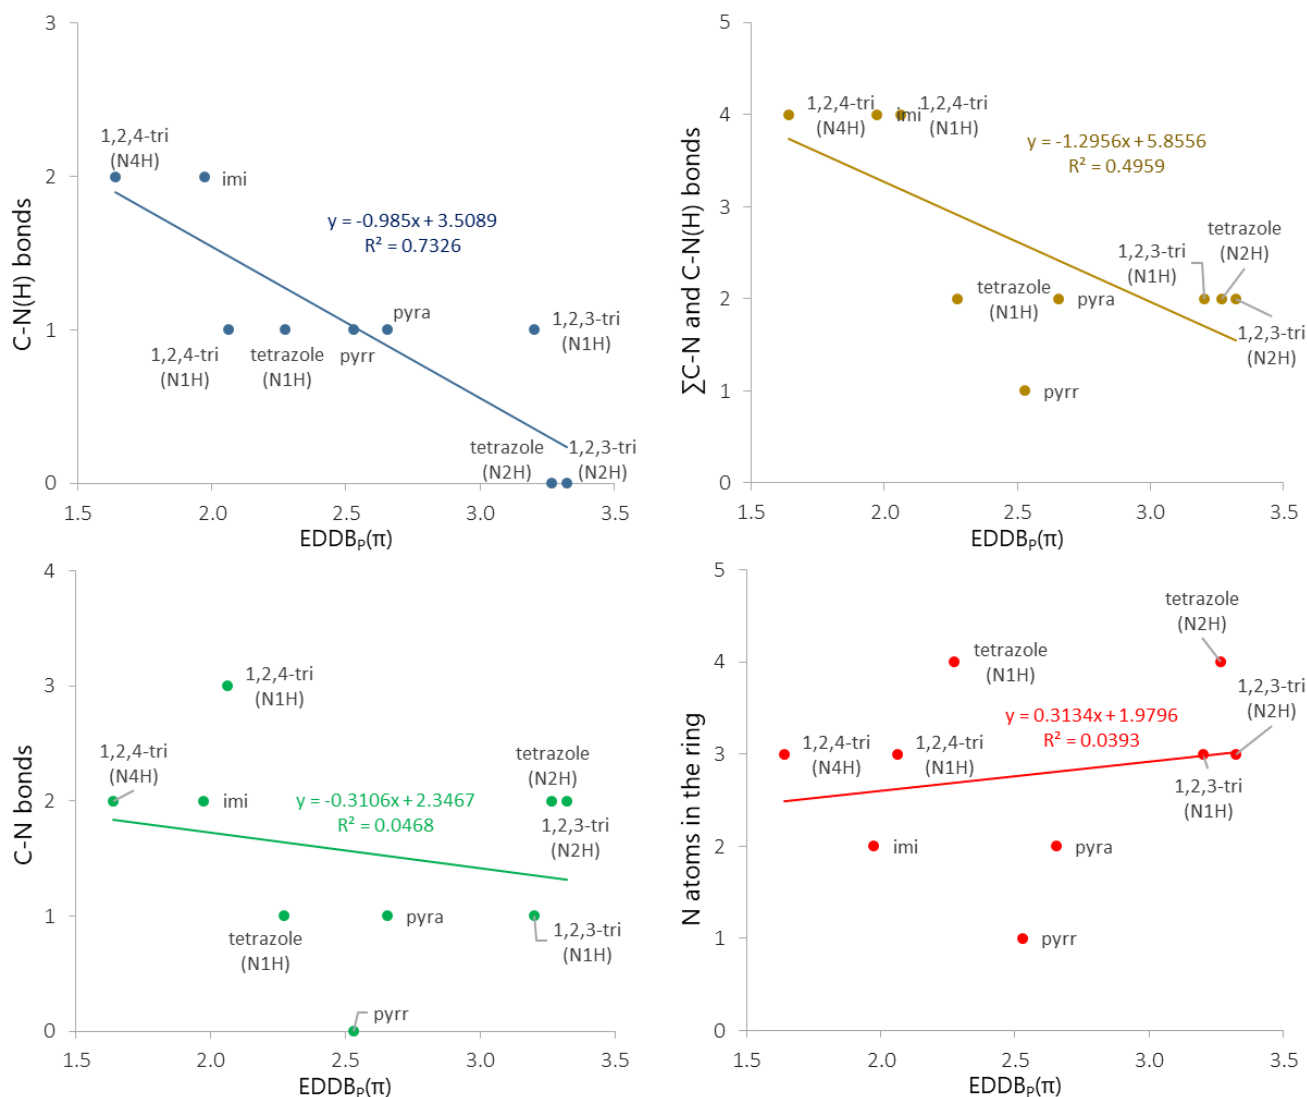

**Figure S1.** Relations between characteristics of five-membered N-heterocyclic rings and number of cyclically delocalized electrons,  $EDDB_p(\pi)$ .

**Table S1.** Coefficients  $a$  (slope) and  $R^2$  of linear correlations  $EDDB_p(\pi)$  vs  $cSAR(X)$  presented in Figure 2.

|                   | $a$    | $R^2$ |
|-------------------|--------|-------|
| imiC2             | -6.865 | 0.919 |
| 1,2,4-triC3 (N1H) | -5.014 | 0.872 |
| pyraC3            | -4.962 | 0.902 |
| pyraC5            | -4.252 | 0.785 |
| 1,2,4-triC5       | -3.844 | 0.882 |
| 1,2,4-triC3 (N4H) | -3.703 | 0.926 |
| pyrrC2            | -2.621 | 0.448 |
| 1,2,3-triC5       | -2.421 | 0.768 |
| 1,2,3-triC4 (N2H) | -2.383 | 0.290 |
| imiC5             | -2.070 | 0.724 |
| imiC4             | -2.018 | 0.781 |
| pyrrC3            | 0.065  | 0.001 |
| 1,2,3-triC4 (N1H) | 0.523  | 0.081 |
| pyraC4            | 3.751  | 0.842 |

**Table S2.** Isosurfaces of  $\text{EDDB}_p(\pi)$  function (0.02), representing the density of cyclically delocalized  $\pi$ -electrons.

| X               | imiC2                                                                                        | imiC4                                                                                        | imiC5                                                                                          |
|-----------------|----------------------------------------------------------------------------------------------|----------------------------------------------------------------------------------------------|------------------------------------------------------------------------------------------------|
| NO <sub>2</sub> | 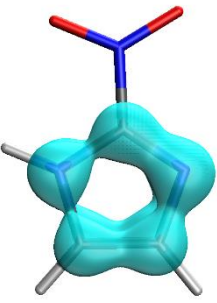<br>2.701   | <br>2.147   | <br>2.257   |
| CN              | <br>2.625  | <br>2.054  | <br>2.145  |
| Br              | <br>1.762 | <br>2.056 | <br>1.886 |
| Cl              | <br>1.708 | <br>2.048 | <br>1.868 |

|    |                                                                                                  |                                                                                                  |                                                                                                    |
|----|--------------------------------------------------------------------------------------------------|--------------------------------------------------------------------------------------------------|----------------------------------------------------------------------------------------------------|
| F  | 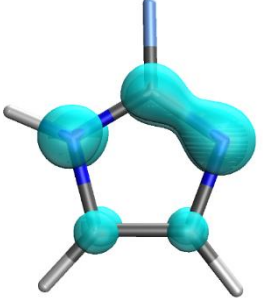 <p>1.264</p>   |  <p>1.950</p>   |  <p>1.708</p>   |
| H  |  <p>1.974</p>   |                                                                                                  |                                                                                                    |
| SH |  <p>1.596</p>  |  <p>1.823</p>  |  <p>2.020</p>  |
| =S |  <p>0.831</p> |  <p>1.310</p> |                                                                                                    |
| OH |  <p>1.150</p> |  <p>1.687</p> |  <p>1.636</p> |

|                 |                                                                                                  |                                                                                                  |                                                                                                    |
|-----------------|--------------------------------------------------------------------------------------------------|--------------------------------------------------------------------------------------------------|----------------------------------------------------------------------------------------------------|
| =O              | 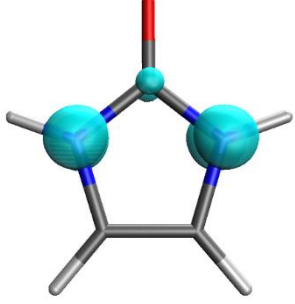 <p>0.605</p>   |  <p>0.896</p>   |                                                                                                    |
| NH <sub>2</sub> |  <p>1.256</p>   |  <p>1.624</p>   |  <p>1.947</p>   |
| =NH             |  <p>0.583</p>  |  <p>0.889</p>  |                                                                                                    |
|                 | <b>pyraC3</b>                                                                                    | <b>pyraC5</b>                                                                                    | <b>pyraC4</b>                                                                                      |
| NO <sub>2</sub> |  <p>2.884</p> |  <p>3.094</p> |  <p>1.995</p> |
| CN              |  <p>2.847</p> |  <p>2.944</p> |  <p>2.079</p> |

|           |                                                                                                  |                                                                                                  |                                                                                                    |
|-----------|--------------------------------------------------------------------------------------------------|--------------------------------------------------------------------------------------------------|----------------------------------------------------------------------------------------------------|
| <b>Br</b> | 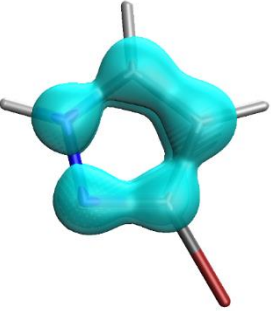 <p>2.604</p>   |  <p>2.528</p>   |  <p>2.541</p>   |
| <b>Cl</b> |  <p>2.521</p>   |  <p>2.487</p>   |  <p>2.568</p>   |
| <b>F</b>  |  <p>2.150</p>  |  <p>2.128</p>  |  <p>2.846</p>  |
| <b>H</b>  |  <p>2.656</p> |                                                                                                  |                                                                                                    |
| <b>SH</b> |  <p>2.314</p> |  <p>2.861</p> |  <p>2.339</p> |



|                 |                                                                                                  |                                                                                                  |                                                                                                    |
|-----------------|--------------------------------------------------------------------------------------------------|--------------------------------------------------------------------------------------------------|----------------------------------------------------------------------------------------------------|
| =S              | 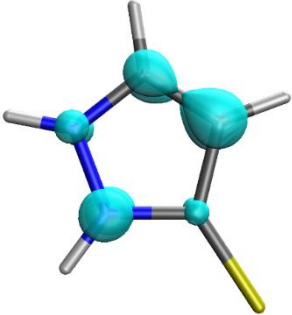 <p>0.762</p>   |                                                                                                  |  <p>2.225</p>   |
| OH              |  <p>1.824</p>   |  <p>2.037</p>   |  <p>2.905</p>   |
| =O              |  <p>0.491</p>  |                                                                                                  |  <p>2.050</p>  |
| NH <sub>2</sub> |  <p>1.811</p> |  <p>2.159</p> |  <p>2.786</p> |
| =NH             |  <p>0.011</p> |                                                                                                  |  <p>1.775</p> |
|                 | pyrrC2                                                                                           | pyrrC3                                                                                           |                                                                                                    |

|                 |                                                                                                  |                                                                                                  |
|-----------------|--------------------------------------------------------------------------------------------------|--------------------------------------------------------------------------------------------------|
| NO <sub>2</sub> | 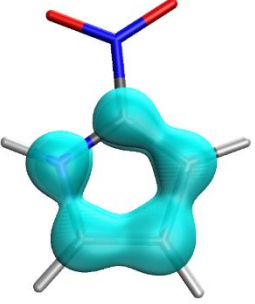 <p>2.647</p>   |  <p>2.031</p>   |
| CN              |  <p>2.609</p>   |  <p>2.115</p>   |
| Br              |  <p>2.394</p>  |  <p>2.462</p>  |
| Cl              |  <p>2.338</p> |  <p>2.444</p> |
| F               |  <p>1.868</p> |  <p>2.321</p> |

|                 |                                                                                              |                                                                                              |                                                                                                |
|-----------------|----------------------------------------------------------------------------------------------|----------------------------------------------------------------------------------------------|------------------------------------------------------------------------------------------------|
| H               | 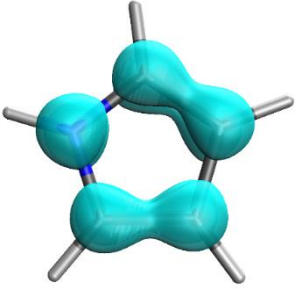<br>2.529   |                                                                                              |                                                                                                |
| SH              | <br>2.602   | <br>2.322   |                                                                                                |
| OH              | <br>1.728  | <br>2.160  |                                                                                                |
| NH <sub>2</sub> | <br>2.459 | <br>1.986 |                                                                                                |
|                 | <b>1,2,3-triC4 (N1H)</b>                                                                     | <b>1,2,3-triC5 (N1H)</b>                                                                     |                                                                                                |
| NO <sub>2</sub> | <br>2.992 | <br>3.190 | <br>3.028 |

|    |                                                                                                  |                                                                                                  |                                                                                                    |
|----|--------------------------------------------------------------------------------------------------|--------------------------------------------------------------------------------------------------|----------------------------------------------------------------------------------------------------|
| CN | 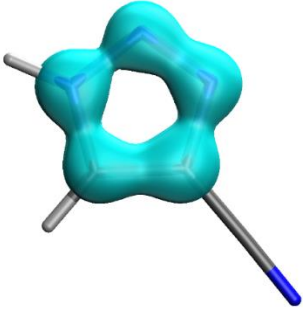 <p>2.911</p>   |  <p>3.124</p>   |  <p>3.110</p>   |
| Br |  <p>3.176</p>   |  <p>3.100</p>   |  <p>3.268</p>   |
| Cl |  <p>3.192</p>  |  <p>3.047</p>  |  <p>3.230</p>  |
| F  |  <p>3.358</p> |  <p>2.780</p> |  <p>2.922</p> |
| H  |  <p>3.202</p> |                                                                                                  |  <p>3.322</p> |

|                 |                                                                                              |                                                                                              |                                                                                                |
|-----------------|----------------------------------------------------------------------------------------------|----------------------------------------------------------------------------------------------|------------------------------------------------------------------------------------------------|
| SH              | 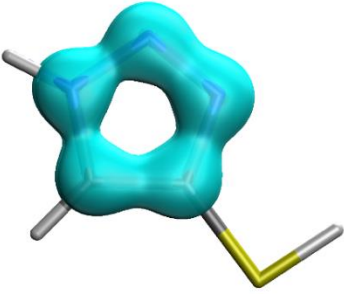<br>3.151   | <br>2.886   | <br>3.071   |
| =S              | <br>2.222   | <br>0.803   | <br>2.203   |
| OH              | <br>3.108  | <br>2.602  | <br>2.453  |
| =O              | <br>1.365 | <br>0.471 | <br>1.581 |
| NH <sub>2</sub> | <br>2.950 | <br>2.604 | <br>2.459 |

|                 |                                                                                                  |                                                                                                  |                                                                                                    |
|-----------------|--------------------------------------------------------------------------------------------------|--------------------------------------------------------------------------------------------------|----------------------------------------------------------------------------------------------------|
| =NH             | 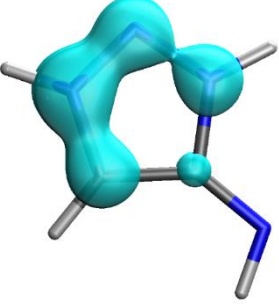 <p>1.113</p>   |  <p>0.406</p>   |  <p>0.982</p>   |
|                 | <b>1,2,4-triC3 (N1H)</b>                                                                         | <b>1,2,4-triC5 (N1H)</b>                                                                         | <b>1,2,4-triC3 (N4H)</b>                                                                           |
| NO <sub>2</sub> |  <p>2.346</p>   |  <p>2.511</p>   |  <p>1.920</p>   |
| CN              |  <p>2.212</p>  |  <p>2.498</p>  |  <p>1.886</p>  |
| Br              |  <p>2.100</p> |  <p>1.884</p> |  <p>1.504</p> |
| Cl              |  <p>2.046</p> |  <p>1.847</p> |  <p>1.469</p> |

|    |                                                                                                  |                                                                                                   |                                                                                                    |
|----|--------------------------------------------------------------------------------------------------|---------------------------------------------------------------------------------------------------|----------------------------------------------------------------------------------------------------|
| F  | 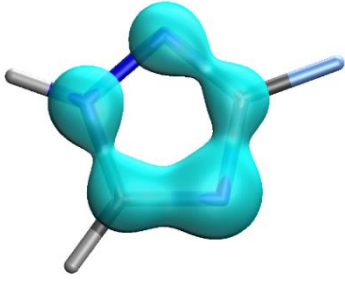 <p>1.842</p>   |  <p>1.507</p>   |  <p>1.174</p>   |
| H  |  <p>2.063</p>   |  <p>1.639</p>  |                                                                                                    |
| SH |  <p>1.857</p>  |  <p>1.772</p>   |  <p>1.370</p>  |
| =S |  <p>0.930</p> |  <p>0.853</p> |  <p>0.825</p> |
| OH |  <p>1.587</p> |  <p>1.443</p>  |  <p>1.066</p> |

|                 |                                                                                                 |                                                                                                  |                                                                                                   |
|-----------------|-------------------------------------------------------------------------------------------------|--------------------------------------------------------------------------------------------------|---------------------------------------------------------------------------------------------------|
| =O              | 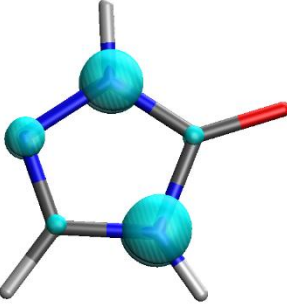 <p>0.713</p>  |  <p>0.564</p>  |  <p>0.474</p>  |
| NH <sub>2</sub> |  <p>1.487</p>  |  <p>1.506</p>   |  <p>1.145</p>  |
| =NH             |  <p>0.619</p> |  <p>0.562</p> |  <p>0.403</p> |



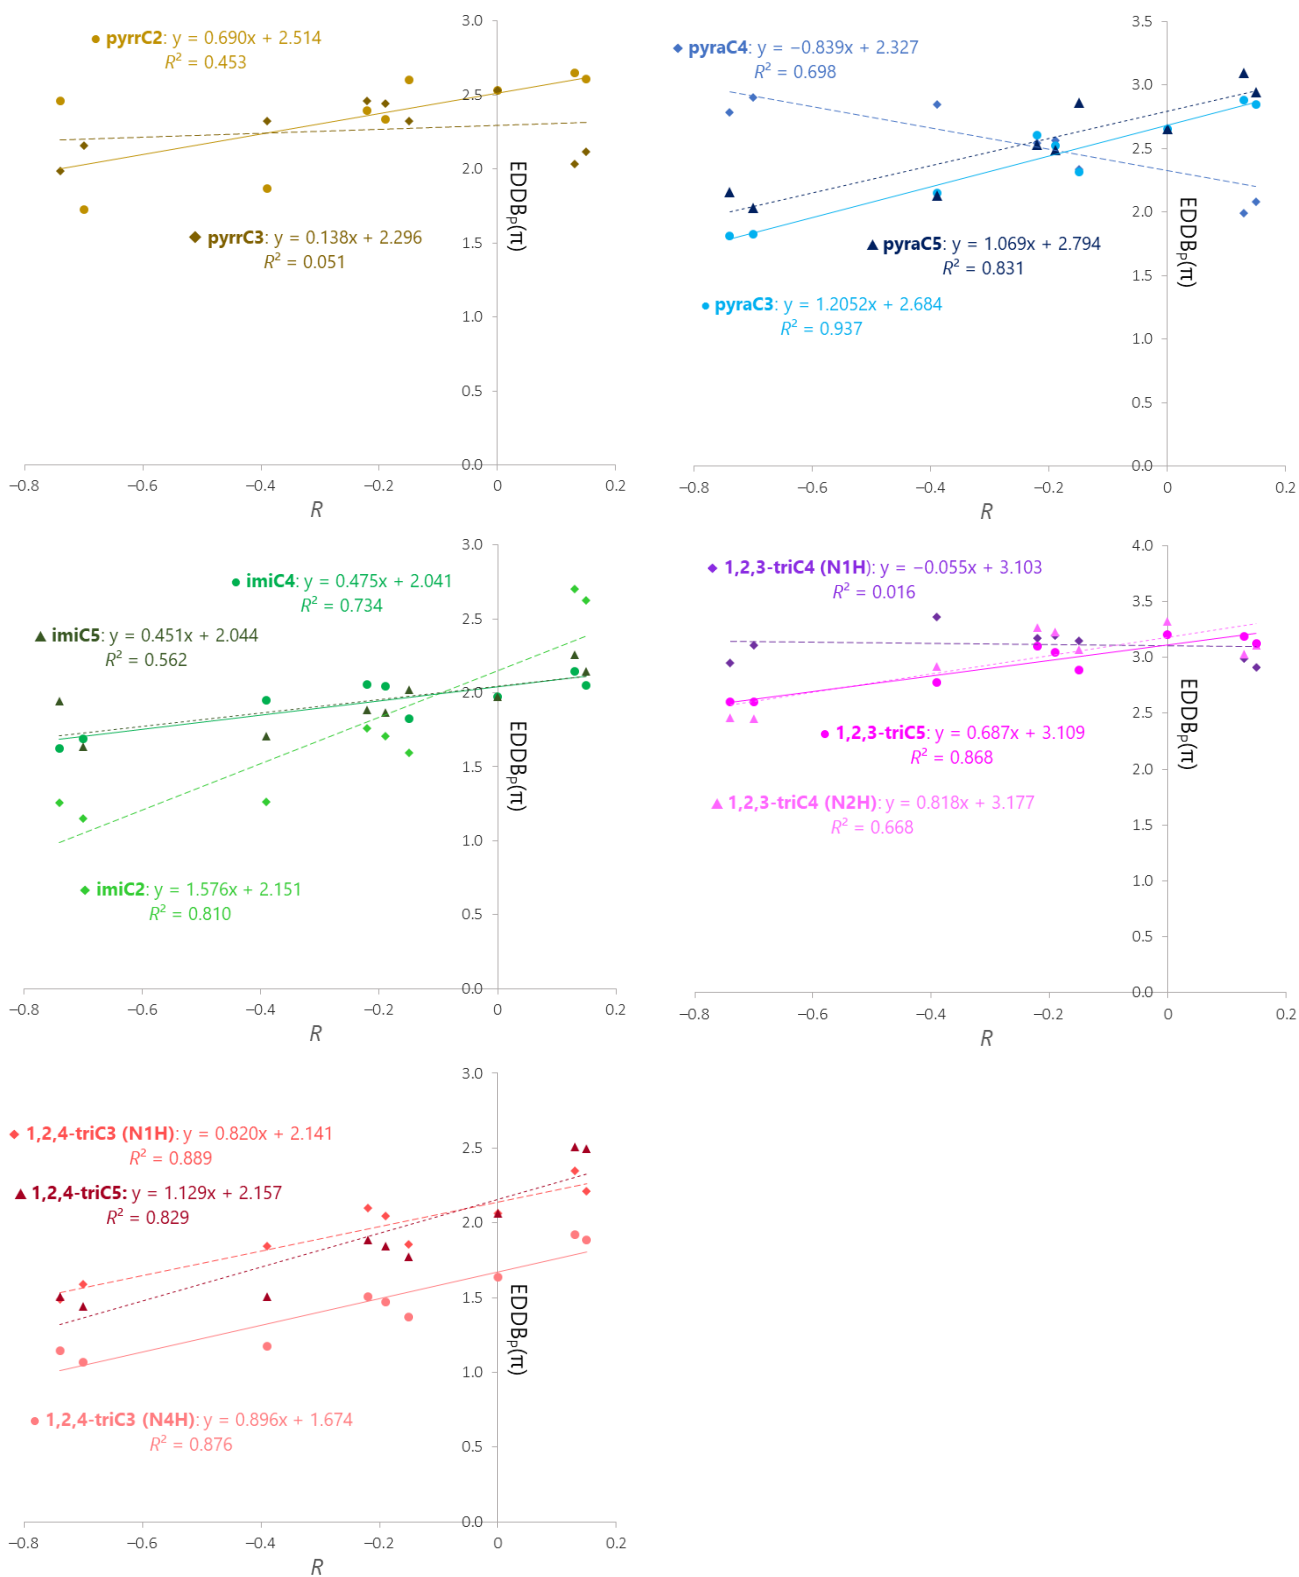

Figure S2. Relationships between EDDB<sub>p</sub>( $\pi$ ) and resonance substituent constant  $R$ .

**pyrrC2**

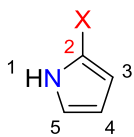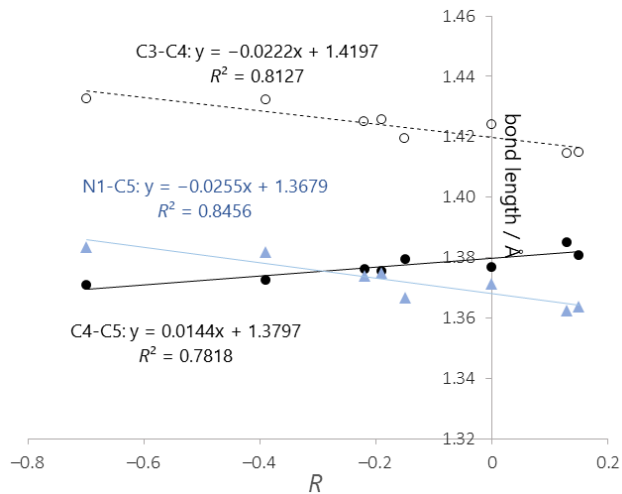

**pyrrC3**

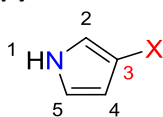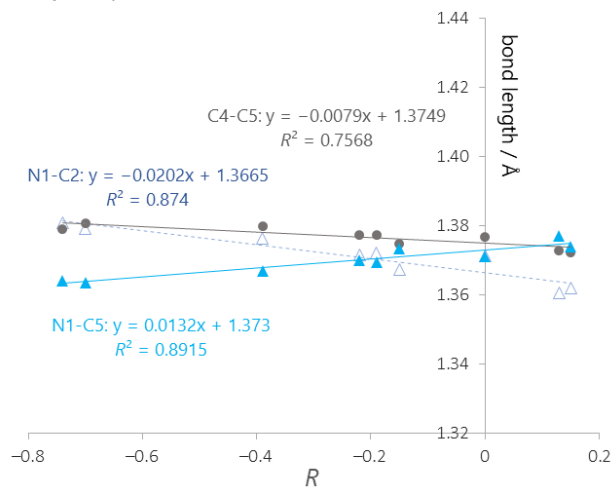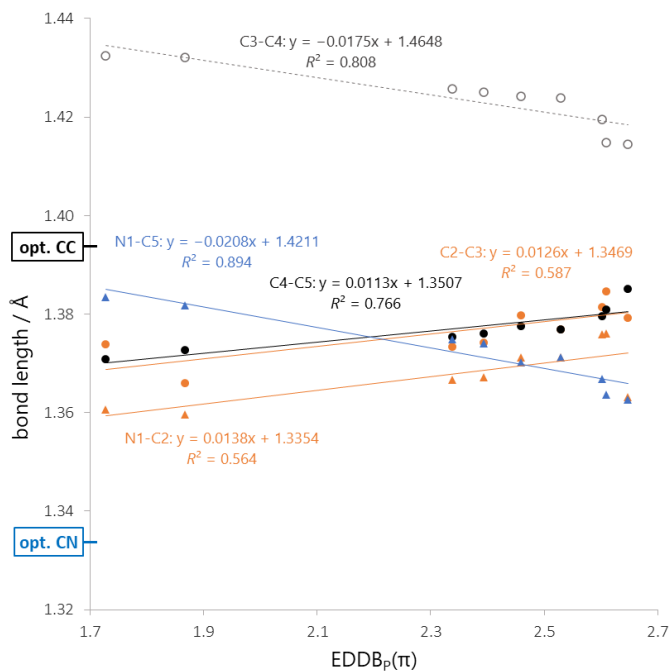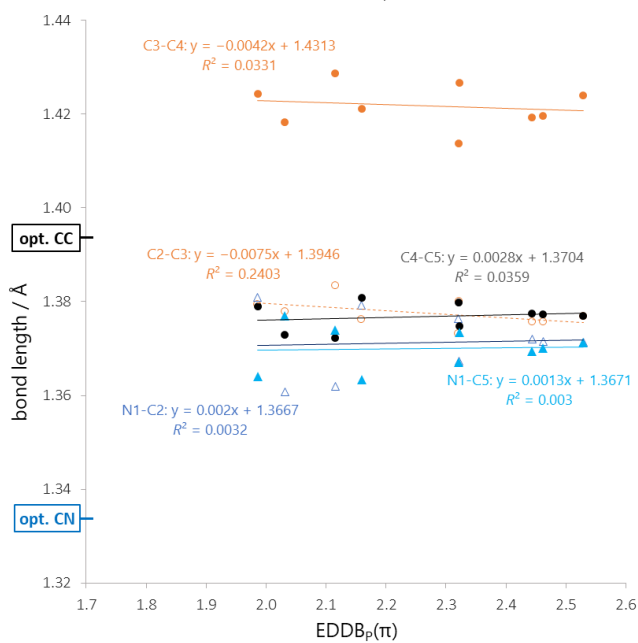

### pyraC4

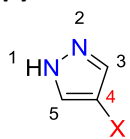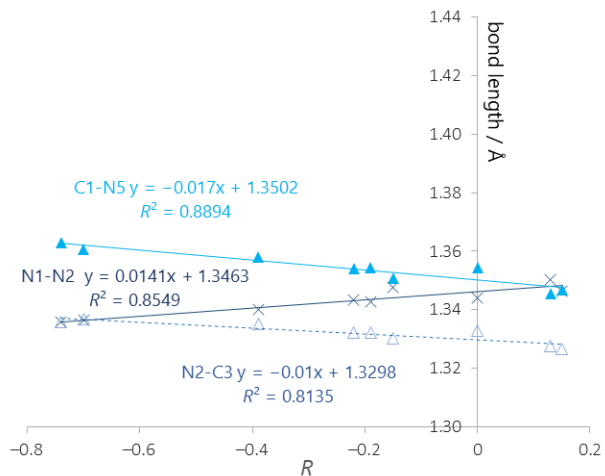

### pyraC3

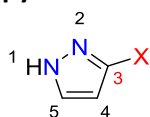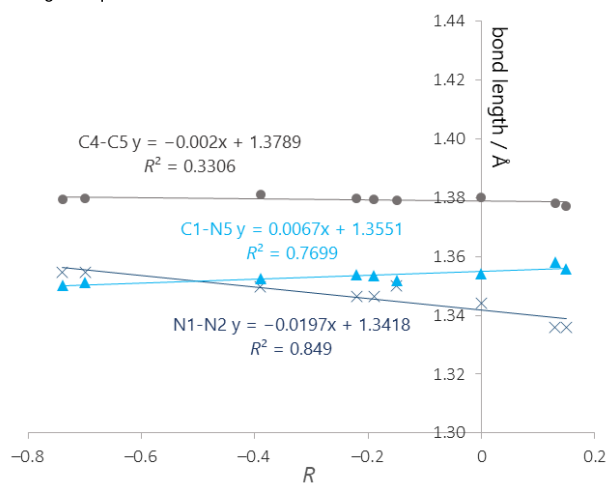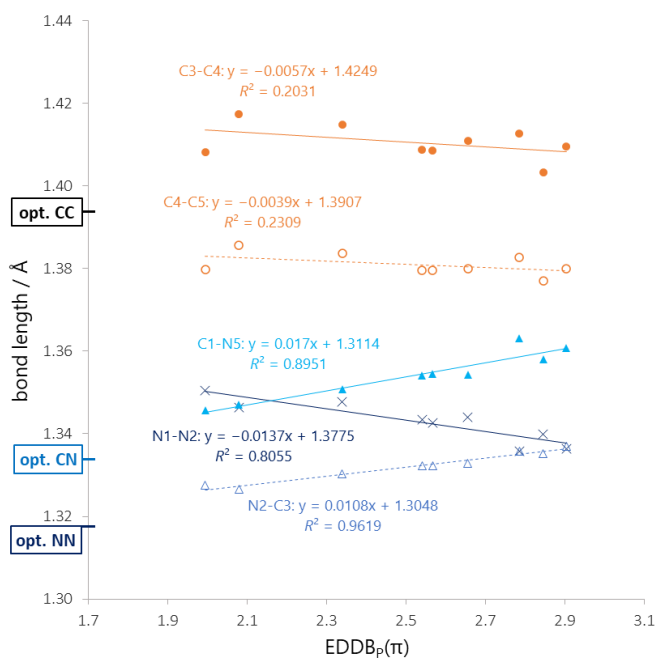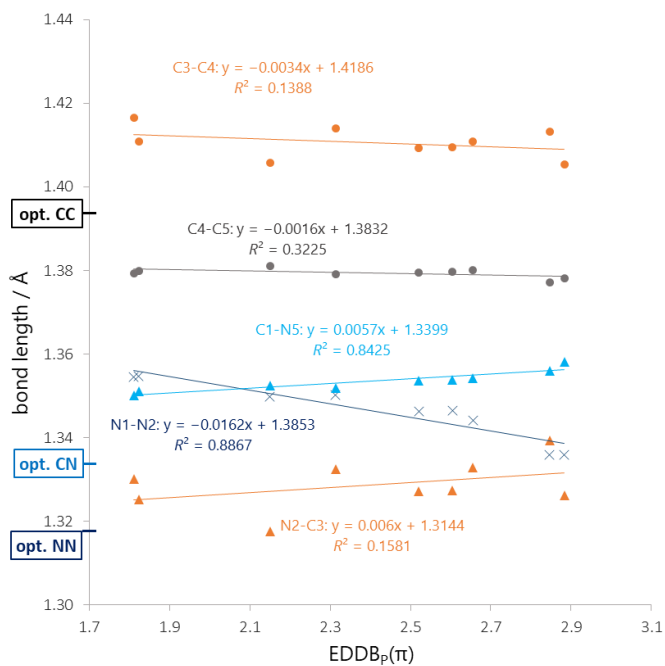

### pyraC5

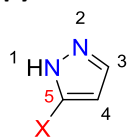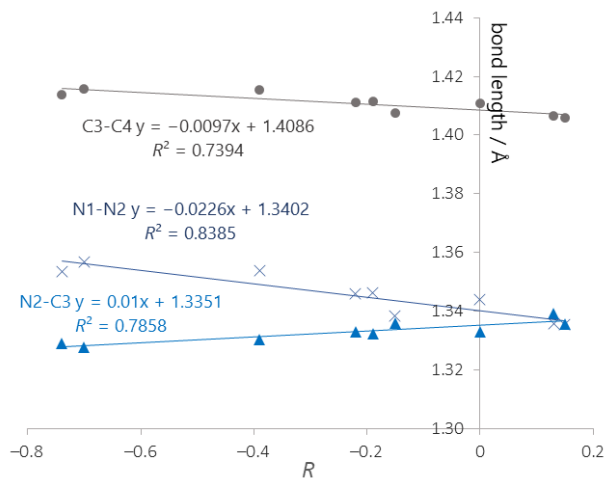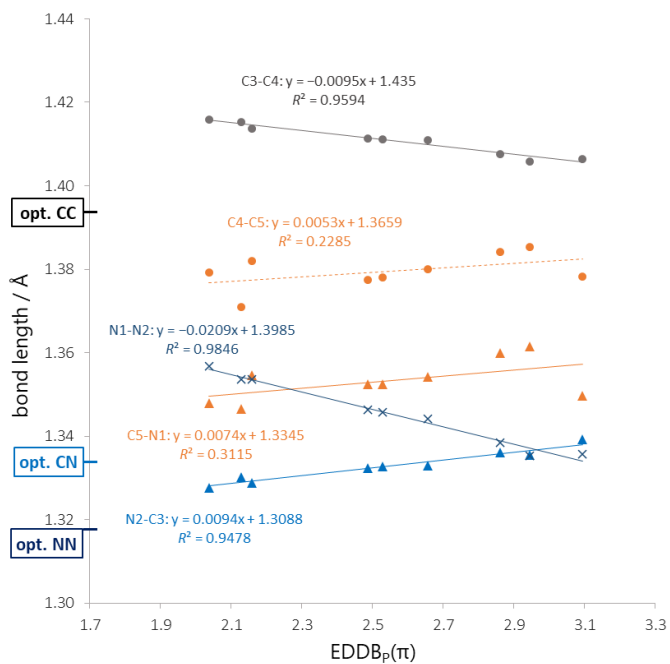

### imiC2

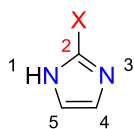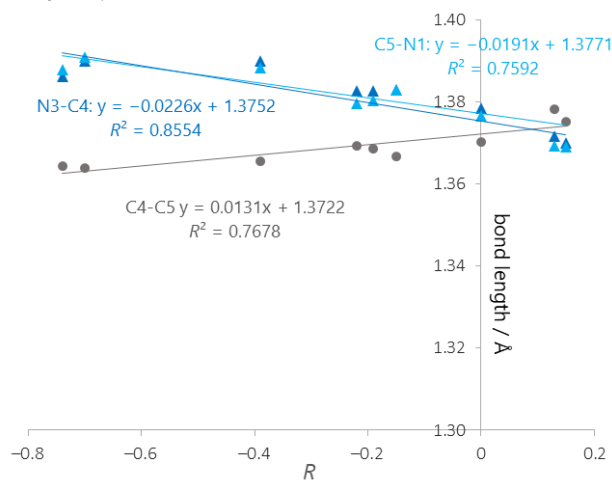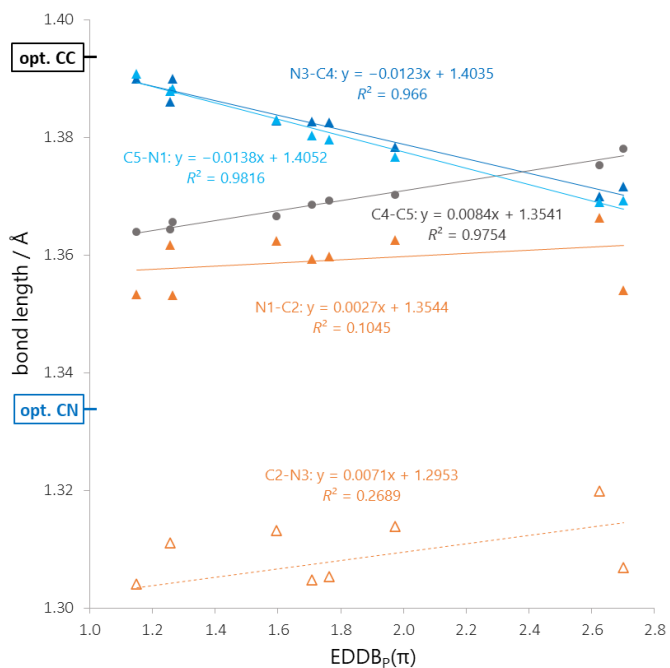

### imiC4

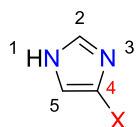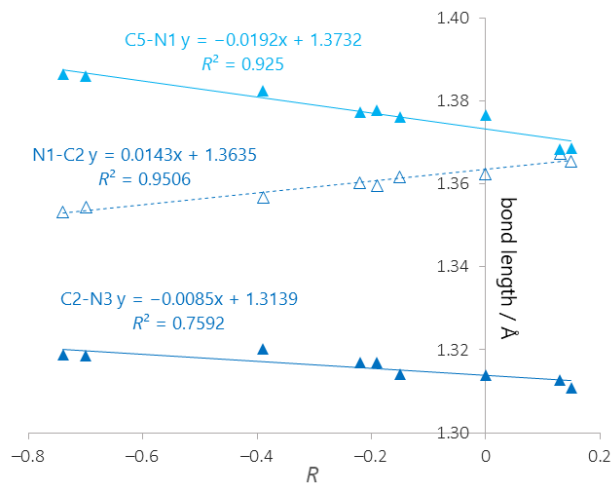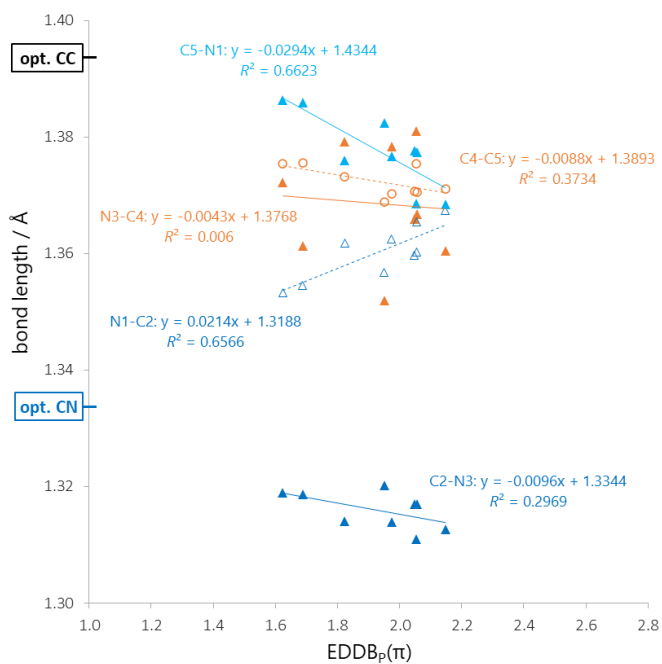

### imiC5

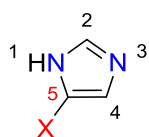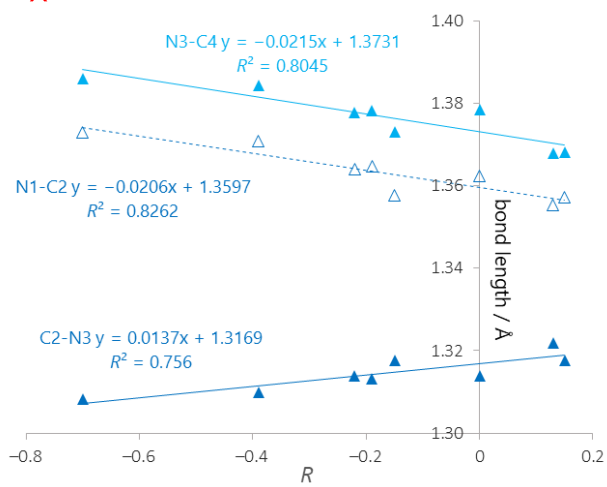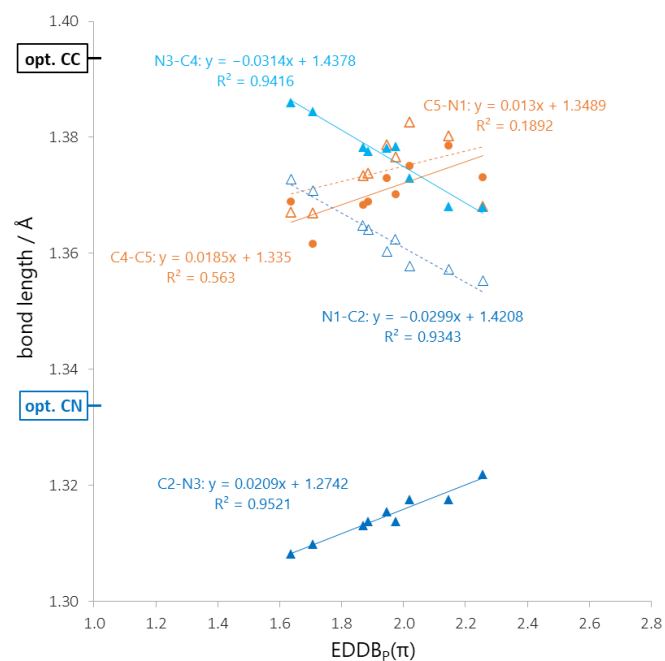

### 1,2,3-triC4 (N1H)

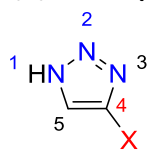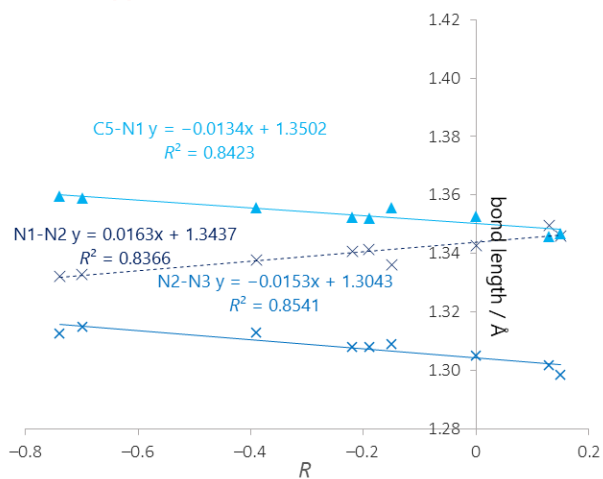

### 1,2,3-triC5 (N1H)

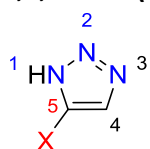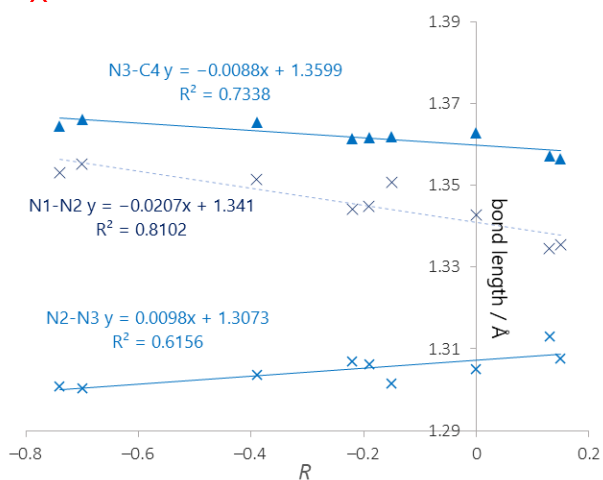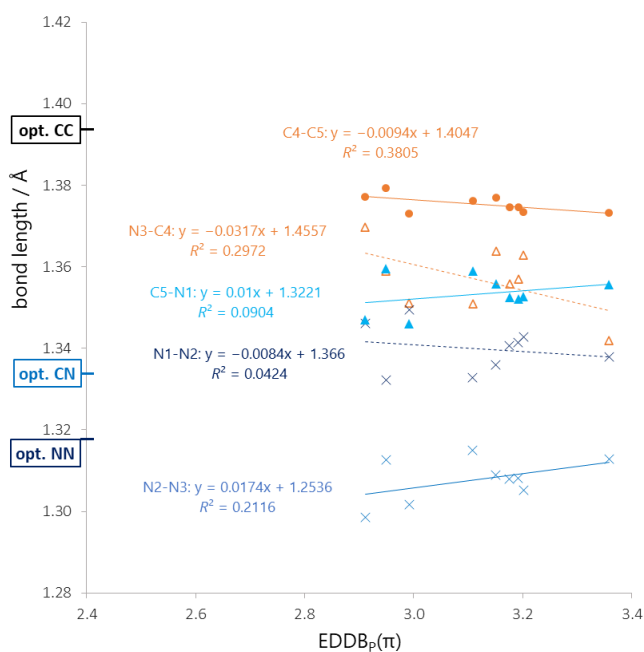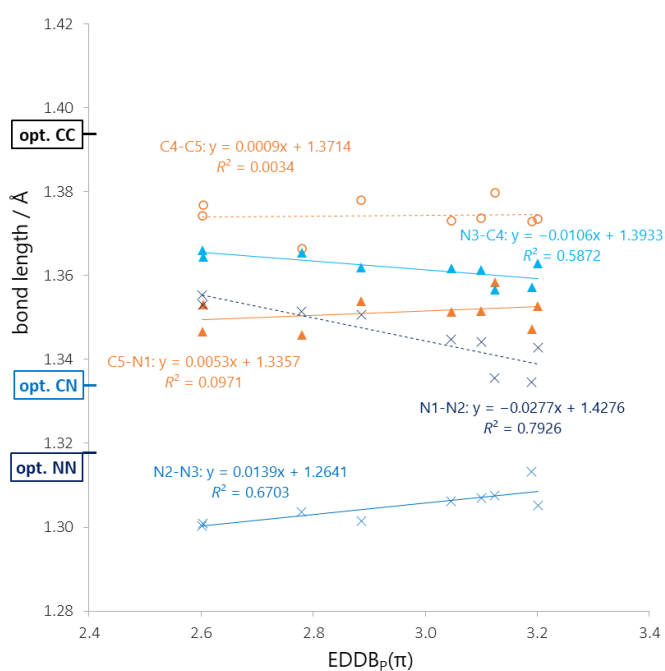

### 1,2,3-triC4 (N2H)

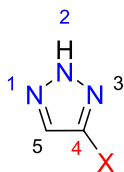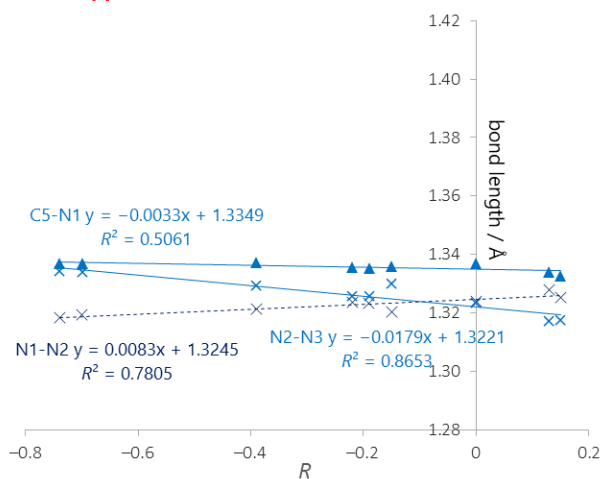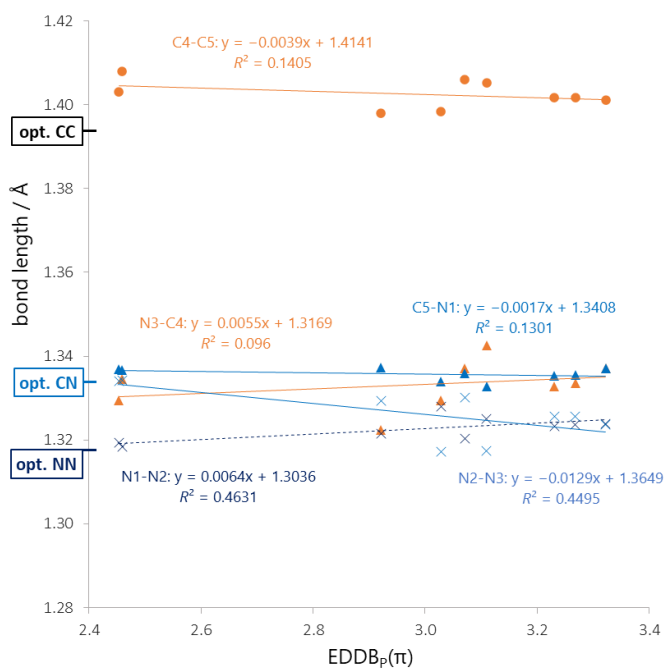

### 1,2,4-triC3 (N1H)

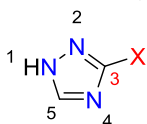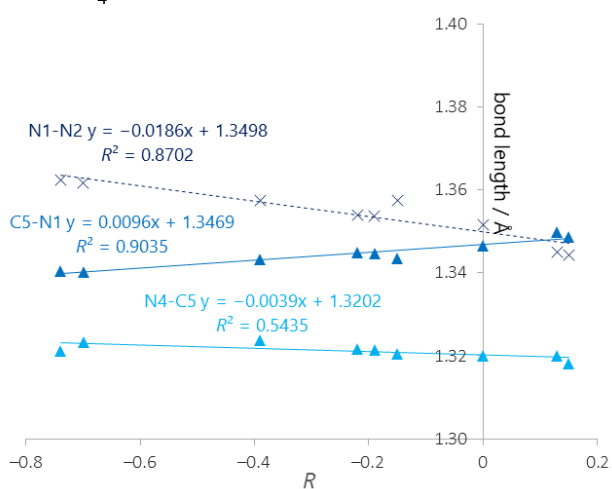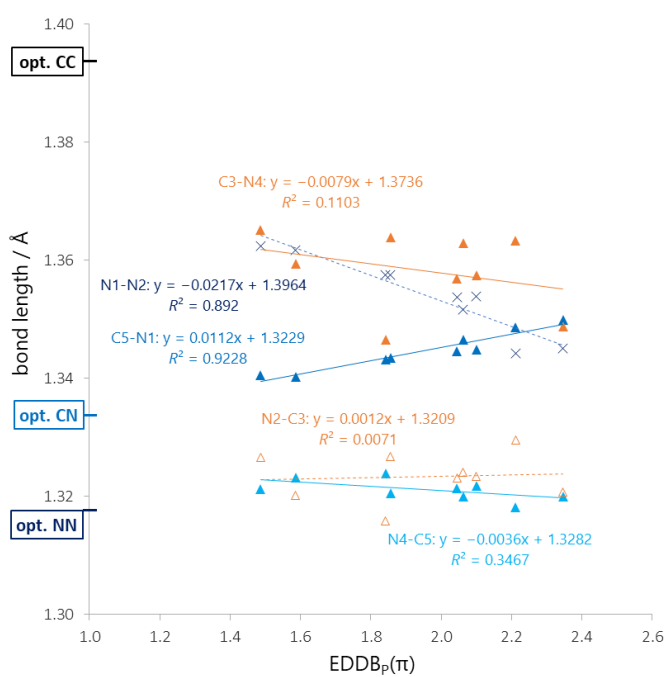

### 1,2,4-triC5

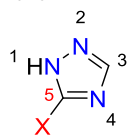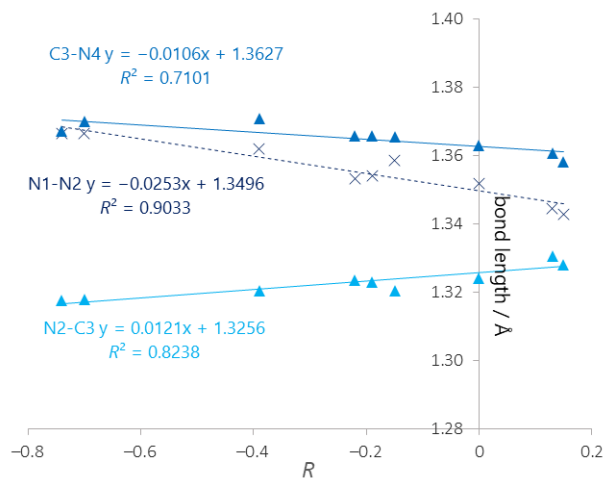

### 1,2,4-triC3 (N4H)

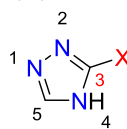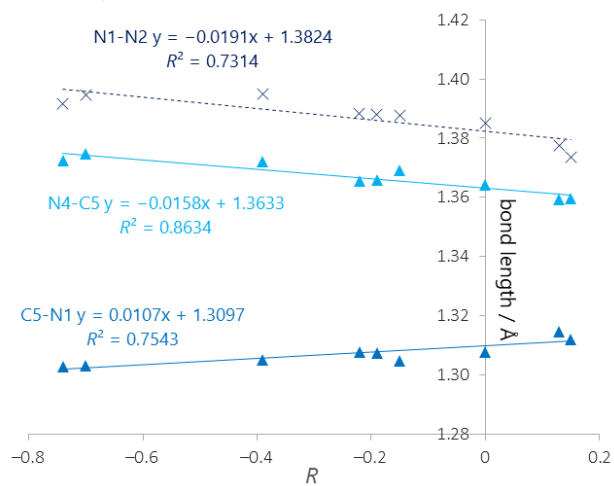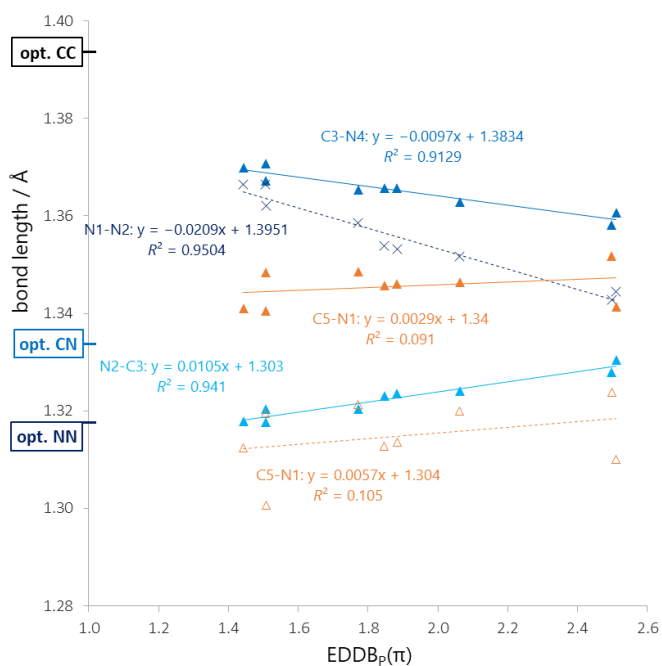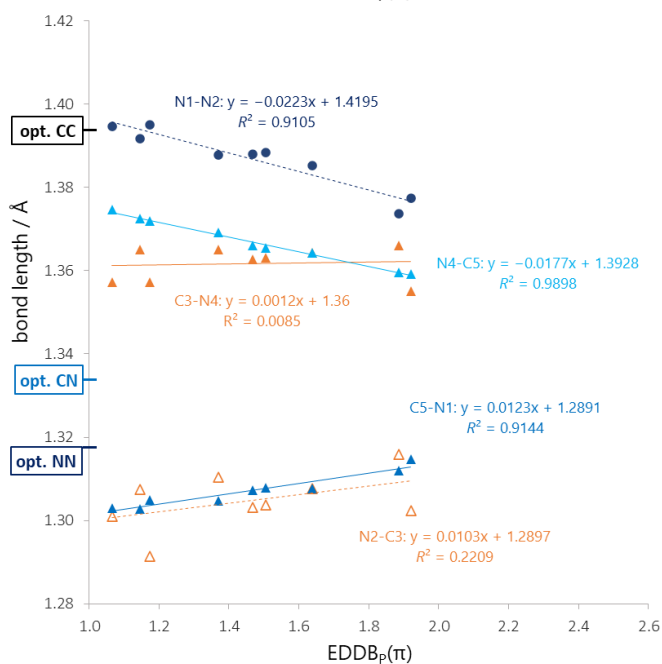

**Figure S3.** Relations between lengths of bonds in the ring and resonance R constants (left column) or the number of cyclically delocalized  $\pi$ -electrons,  $EDDB_p(\pi)$  (right column).



n in  $sp^n$  hybrids (NBO analysis)

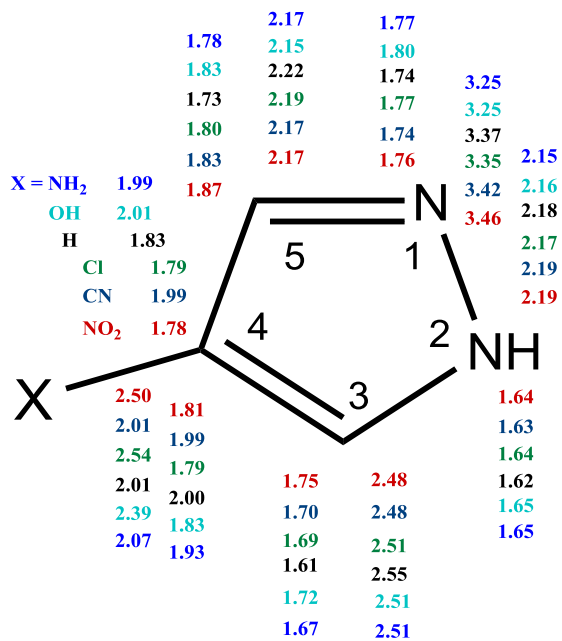

**Figure S4.** NBO analysis – natural hybrid orbital character of hybrids at ring atoms. Example – C4 substituted pyrazole derivatives (pyraC4).

**Table S3.** Crystallographic data found for monosubstituted compounds in CCSD.

|                              | R               | constant | N1-C2  | C2-N3  | N3-C4  | C4-C5  | C5-N1  | ref           |
|------------------------------|-----------------|----------|--------|--------|--------|--------|--------|---------------|
| <b>imic4</b>                 | <b>NO2</b>      | 0.13     | 1.3673 | 1.3126 | 1.3605 | 1.3711 | 1.3685 | KOMHAV [1]    |
|                              | exp             |          | 1.3479 | 1.3187 | 1.3630 | 1.3614 | 1.3500 |               |
|                              | <b>Br</b>       | -0.22    | 1.3602 | 1.3170 | 1.3668 | 1.3705 | 1.3773 | LUDJAX [2]    |
|                              | exp             |          | 1.3399 | 1.3242 | 1.3453 | 1.3606 | 1.3529 |               |
| <b>imic2</b>                 | <b>NO2</b>      | 0.15     | 1.3673 | 1.3126 | 1.3605 | 1.3711 | 1.3685 | CELBAW [3]    |
|                              | exp             |          | 1.3426 | 1.3178 | 1.3703 | 1.3756 | 1.3689 |               |
|                              | <b>Cl</b>       | -0.19    | 1.3593 | 1.3047 | 1.3827 | 1.3686 | 1.3803 | EJEGOS [4]    |
|                              | exp             |          | 1.3243 | 1.3169 | 1.3833 | 1.3658 | 1.3796 |               |
|                              | <b>NH2</b>      | -0.74    | 1.3617 | 1.3110 | 1.3861 | 1.3644 | 1.3879 | CIVRUV [5]    |
|                              | exp-nh-co-nh-ph |          | 1.3448 | 1.3235 | 1.3910 | 1.3475 | 1.3836 |               |
| <b>pyrac4</b>                | <b>NO2</b>      | 0.13     | 1.3504 | 1.3275 | 1.4082 | 1.3797 | 1.3456 | WIKZUL [6]    |
|                              | exp             |          | 1.3588 | 1.3283 | 1.3905 | 1.3796 | 1.3259 |               |
|                              | <b>NH2</b>      | -0.74    | 1.3357 | 1.3358 | 1.4127 | 1.3828 | 1.3631 | HIWJIG [7]    |
|                              | exp             |          | 1.3457 | 1.3299 | 1.3879 | 1.3859 | 1.3540 |               |
| <b>1,2,3-triC4<br/>(N1H)</b> | <b>NO2</b>      | 0.13     |        |        |        |        |        | RAMVUW [8]    |
|                              | exp             |          | 1.3451 | 1.3025 | 1.3410 | 1.3631 | 1.3226 |               |
|                              | <b>SF5</b>      | 0.12     | 1.3427 | 1.3136 | 1.3550 | 1.3683 | 1.3324 | LIPTOU [9]    |
| <b>1,2,4-triC3<br/>(N1H)</b> | <b>NO2</b>      | 0.13     | 1.3450 | 1.3207 | 1.3487 | 1.3199 | 1.3499 | CIFROY [10]   |
|                              | exp 1           |          | 1.3502 | 1.3131 | 1.3428 | 1.3290 | 1.3325 |               |
|                              | <b>Br</b>       | -0.22    | 1.3539 | 1.3234 | 1.3574 | 1.3217 | 1.3449 | BIJLEL01 [11] |
|                              | exp             |          | 1.3549 | 1.3073 | 1.3458 | 1.3232 | 1.3193 |               |
|                              | <b>Cl</b>       | -0.19    | 1.3537 | 1.3231 | 1.3569 | 1.3214 | 1.3446 | CLTRZL [12]   |
|                              | exp             |          | 1.3671 | 1.3133 | 1.3500 | 1.3291 | 1.3157 |               |
| <b>1,2,4-triC3<br/>(N4H)</b> | <b>NH2</b>      | -0.74    | 1.3917 | 1.3074 | 1.3650 | 1.3724 | 1.3028 | CEBPEH [13]   |
|                              | exp             |          | 1.3875 | 1.3375 | 1.3465 | 1.3643 | 1.2943 |               |

[1] [10.1107/S0108270191008065](https://doi.org/10.1107/S0108270191008065), [2] [10.5517/cc1j0ndl](https://doi.org/10.5517/cc1j0ndl), [3] [10.1107/S010827018400384X](https://doi.org/10.1107/S010827018400384X), [4] [10.5517/ccdc.csd.cc25wqd6](https://doi.org/10.5517/ccdc.csd.cc25wqd6), [5] [10.5517/ccq5bfm](https://doi.org/10.5517/ccq5bfm), [6] [10.1107/S0108768194004180](https://doi.org/10.1107/S0108768194004180), [7] [10.5517/cc3tyys](https://doi.org/10.5517/cc3tyys), [8] [10.5517/cc52rnm](https://doi.org/10.5517/cc52rnm), [9] [10.1021/ol701602a](https://doi.org/10.1021/ol701602a), [10] G.Evrard, F.Durant, A.Michel, J.G.Fripiat, J.L.Closset, A.Copin, *Bull. Soc. Chim. Belg.* **1984**, *93*, 233, [11] [10.5517/cc5dn4b](https://doi.org/10.5517/cc5dn4b), [12] M.S.Idrissi, M.Senechal, H.Sauvaitre, M.Cotrait, C.Garrigou-Lagrange, *J.Chim.Phys.*, **1980**, *77*, 195, [13] [10.5517/ccdc.csd.cczy5f](https://doi.org/10.5517/ccdc.csd.cczy5f)

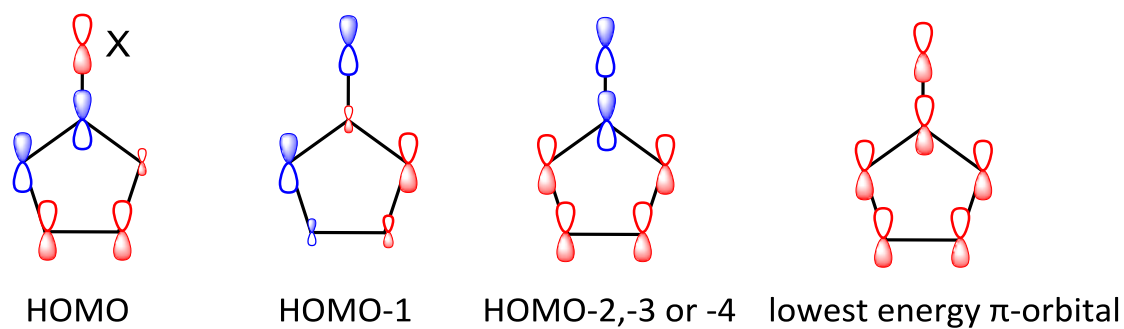

**Figure S5.**  $\pi$ -Orbital shapes independent of X substituent type.

**Table S4.** Isosurfaces of  $\text{EDDB}_{\text{G-P}}$  function (0.02 electrons) – a visual representation of non-cyclic electron delocalization.

| X             | imiC2 | imiC4 | imiC5 |
|---------------|-------|-------|-------|
| $\text{NO}_2$ |       |       |       |
| CN            |       |       |       |
| Br            |       |       |       |

|    |                                                                                     |                                                                                     |                                                                                       |
|----|-------------------------------------------------------------------------------------|-------------------------------------------------------------------------------------|---------------------------------------------------------------------------------------|
| Cl | 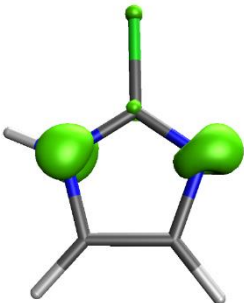   |    |    |
| F  |    |    |    |
| H  |   |                                                                                     |                                                                                       |
| SH |  |  |  |
| =S |  |  |                                                                                       |
| OH |  |  |  |

|                 |                                                                                    |                                                                                    |                                                                                     |
|-----------------|------------------------------------------------------------------------------------|------------------------------------------------------------------------------------|-------------------------------------------------------------------------------------|
| =O              | 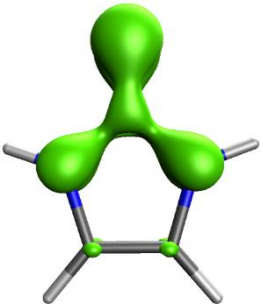  |   |                                                                                     |
| NH <sub>2</sub> |   |   |  |
| =NH             |  |  |                                                                                     |

|                 | pyraC3                                                                              | pyraC5                                                                              | pyraC4                                                                                |
|-----------------|-------------------------------------------------------------------------------------|-------------------------------------------------------------------------------------|---------------------------------------------------------------------------------------|
| NO <sub>2</sub> | 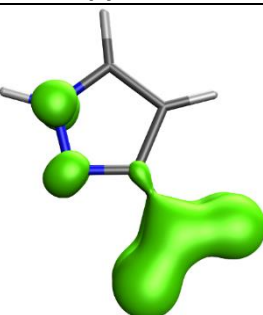 |  |  |
| CN              |  |  |  |

|    |                                                                                     |                                                                                     |                                                                                       |
|----|-------------------------------------------------------------------------------------|-------------------------------------------------------------------------------------|---------------------------------------------------------------------------------------|
| Br | 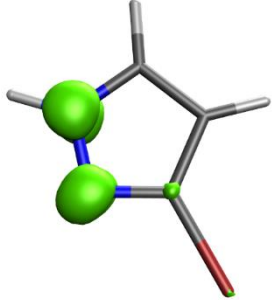   |    |    |
| Cl |    |    |    |
| F  |   |   |   |
| H  |  |                                                                                     |                                                                                       |
| SH |  |  |  |
| =S |  |                                                                                     |  |

|                 |                                                                                     |                                                                                    |                                                                                       |
|-----------------|-------------------------------------------------------------------------------------|------------------------------------------------------------------------------------|---------------------------------------------------------------------------------------|
| OH              | 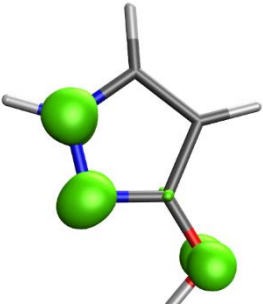   |   |    |
| =O              |    |                                                                                    |    |
| NH <sub>2</sub> |   |  |   |
| =NH             |  |                                                                                    |  |

|                 | pyrrC2                                                                              | pyrrC3                                                                               |
|-----------------|-------------------------------------------------------------------------------------|--------------------------------------------------------------------------------------|
| NO <sub>2</sub> | 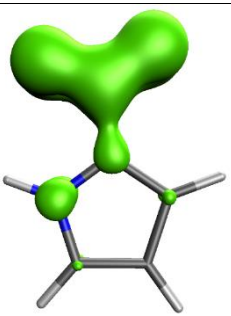 |  |

|    |                                                                                     |                                                                                      |
|----|-------------------------------------------------------------------------------------|--------------------------------------------------------------------------------------|
| CN | 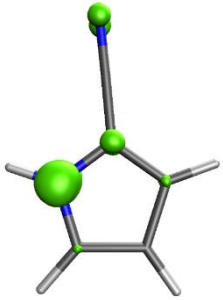   |     |
| Br |    |     |
| Cl |   |    |
| F  |  |   |
| H  |  |                                                                                      |
| SH |  |  |



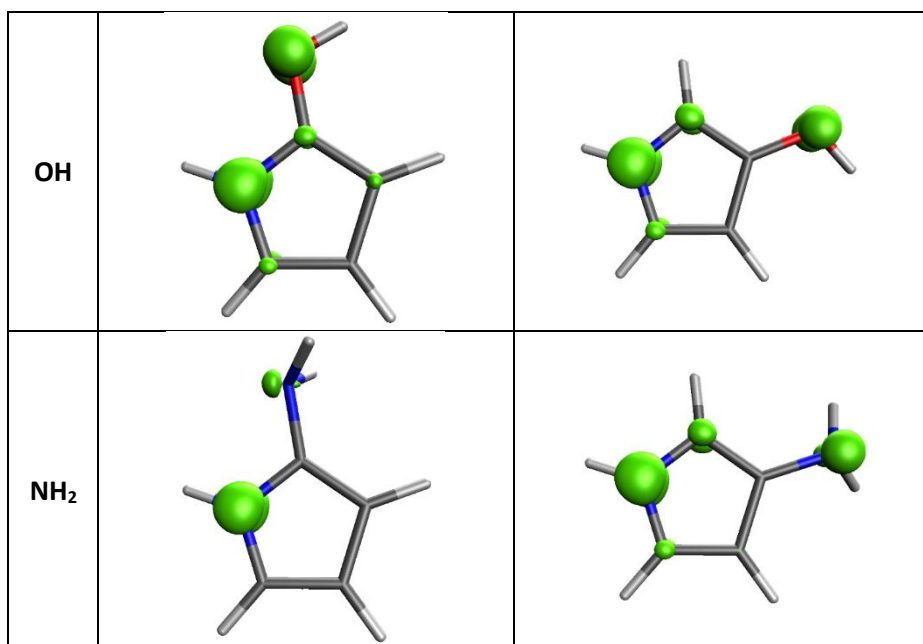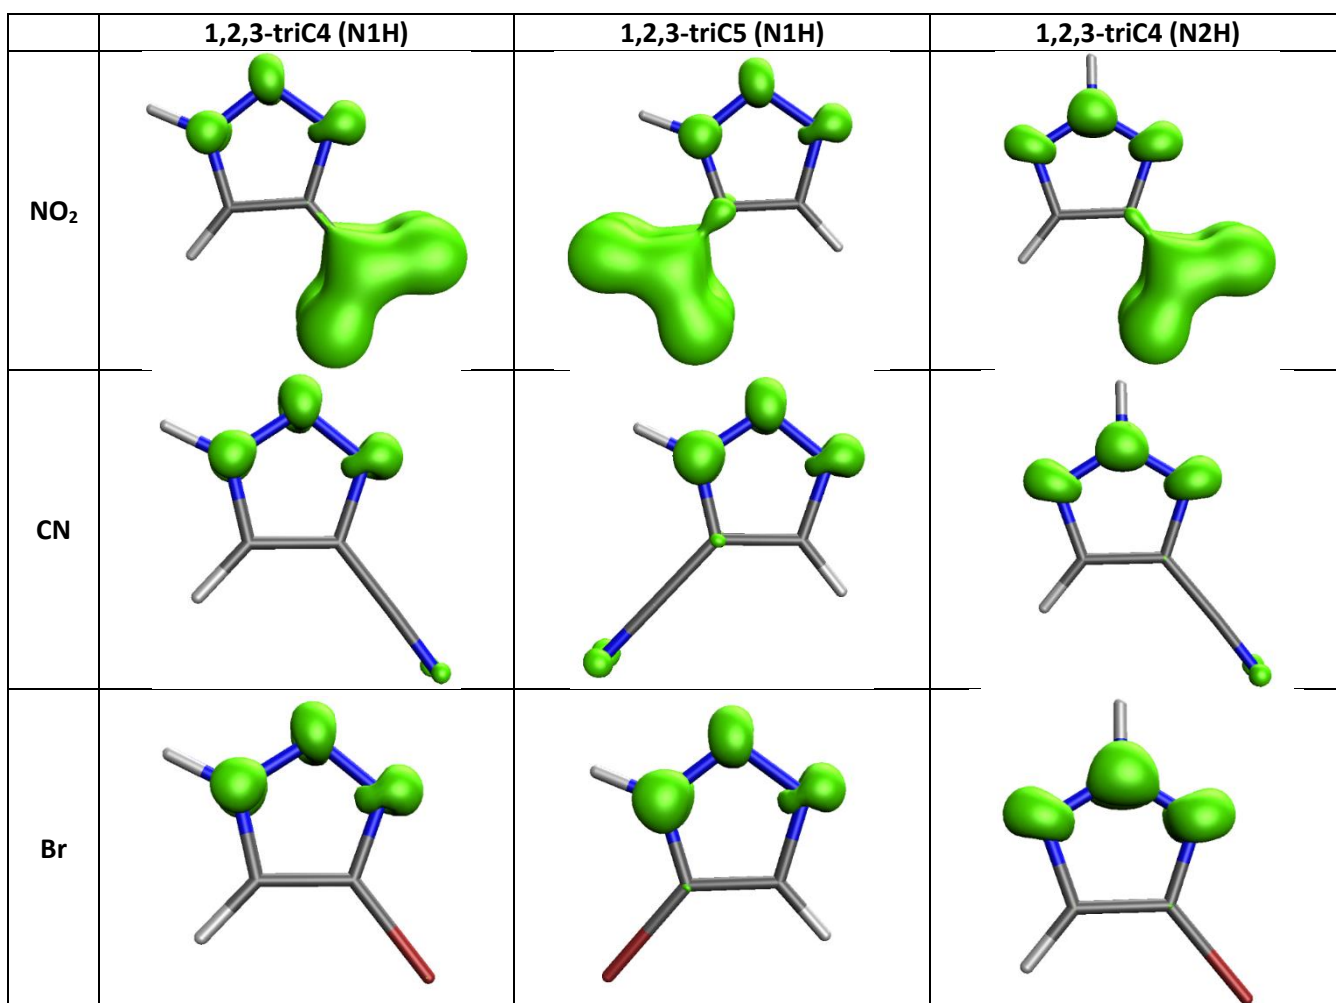

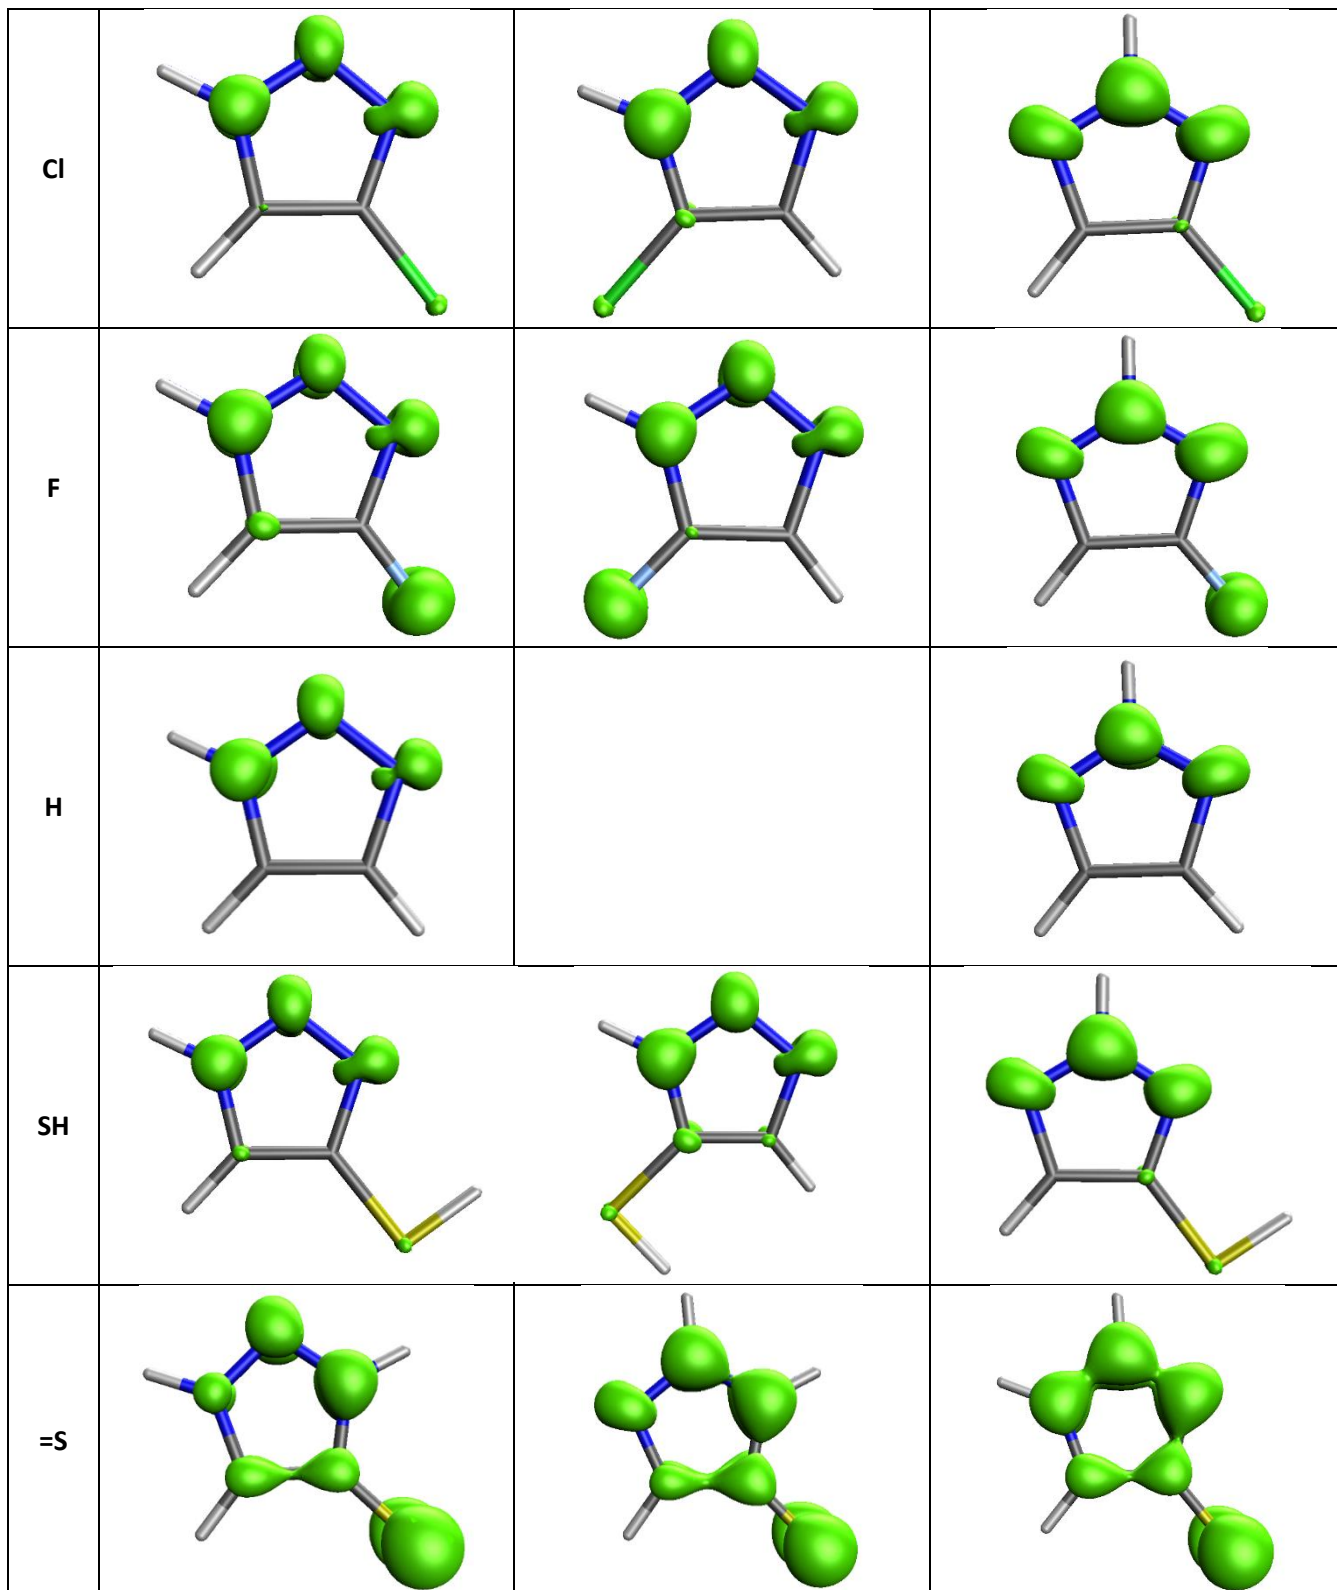

|                 |                                                                                     |                                                                                     |                                                                                       |
|-----------------|-------------------------------------------------------------------------------------|-------------------------------------------------------------------------------------|---------------------------------------------------------------------------------------|
| OH              | 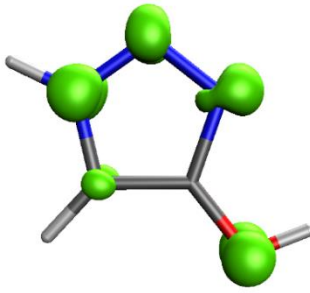   |    |    |
| =O              |    |    |    |
| NH <sub>2</sub> |   |   |   |
| =NH             |  |  |  |

|                 | 1,2,4-triC3 (N1H)                                                                   | 1,2,4-triC5 (N1H)                                                                   | 1,2,4-triC3 (N4H)                                                                     |
|-----------------|-------------------------------------------------------------------------------------|-------------------------------------------------------------------------------------|---------------------------------------------------------------------------------------|
| NO <sub>2</sub> | 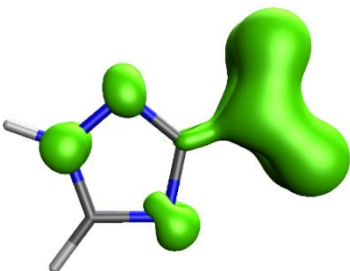 |  |  |

|    |  |  |  |
|----|--|--|--|
| CN |  |  |  |
| Br |  |  |  |
| Cl |  |  |  |
| F  |  |  |  |
| H  |  |  |  |

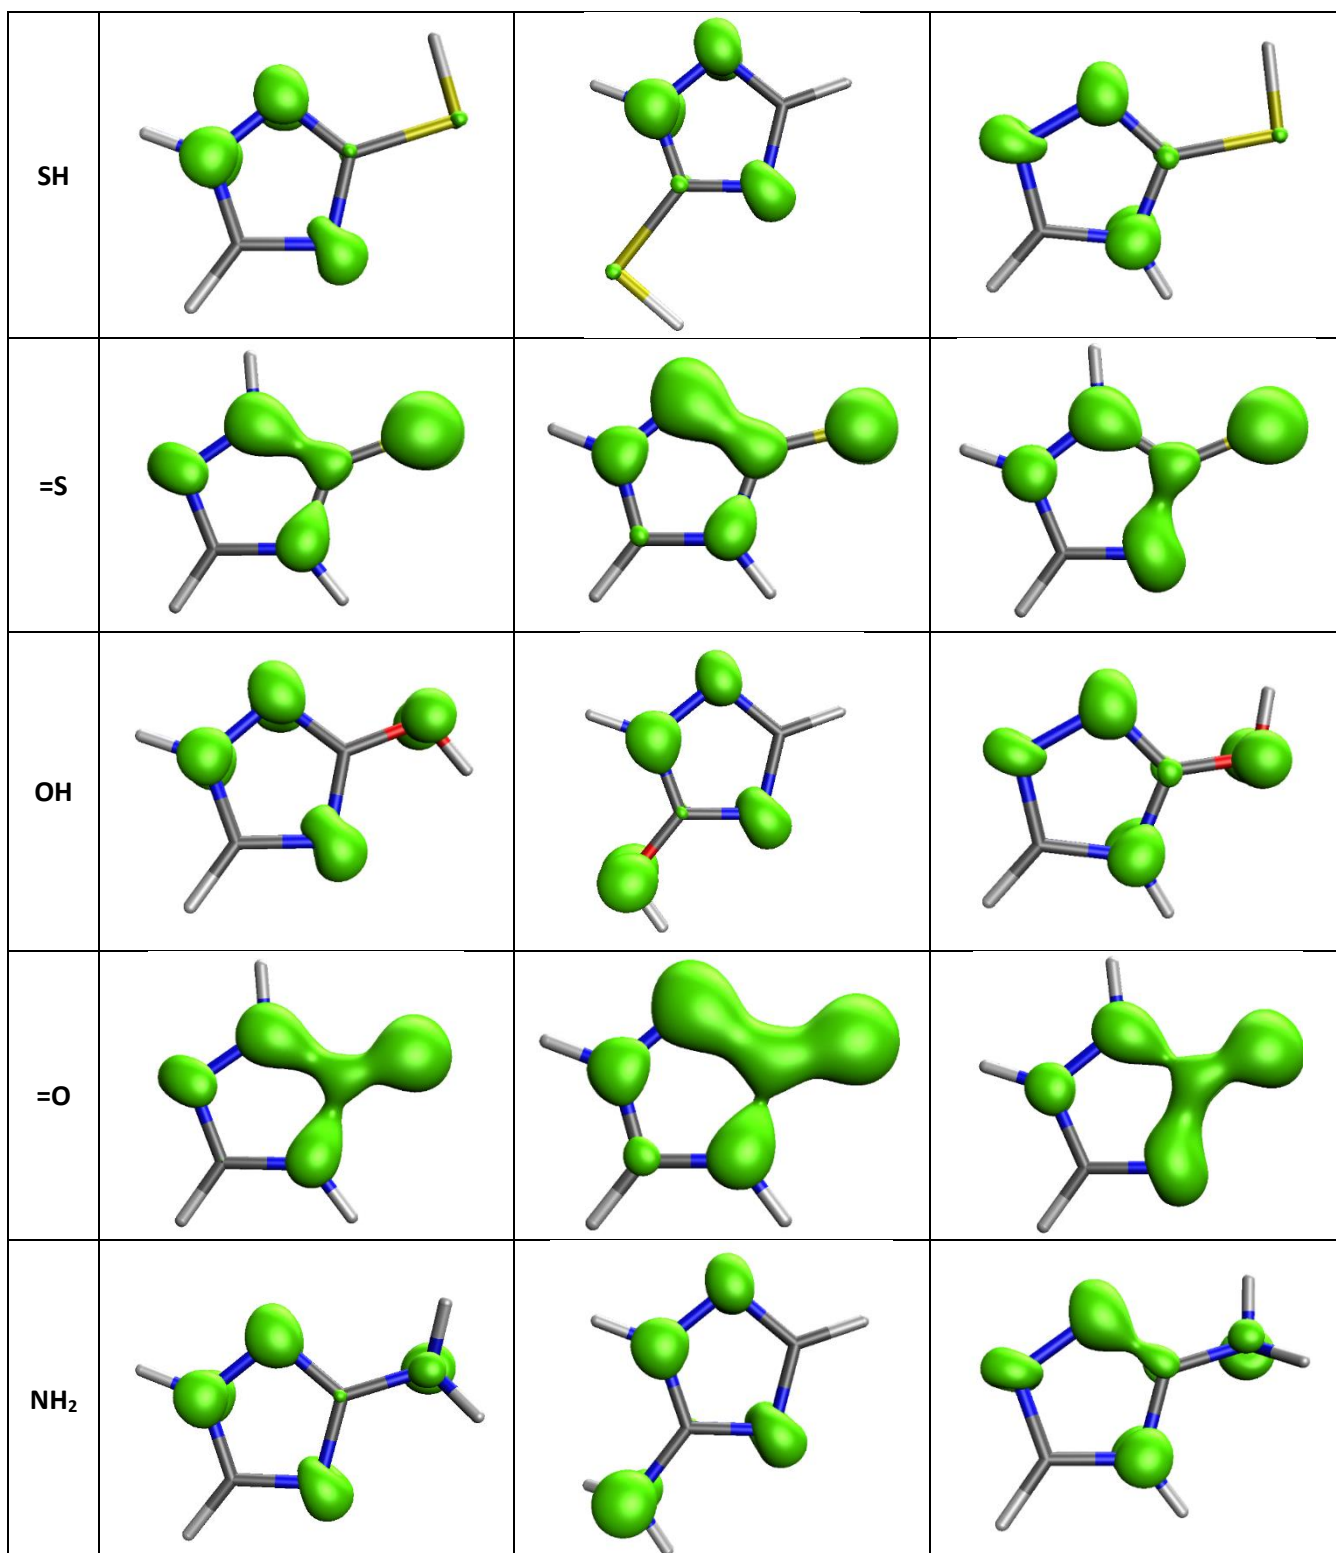

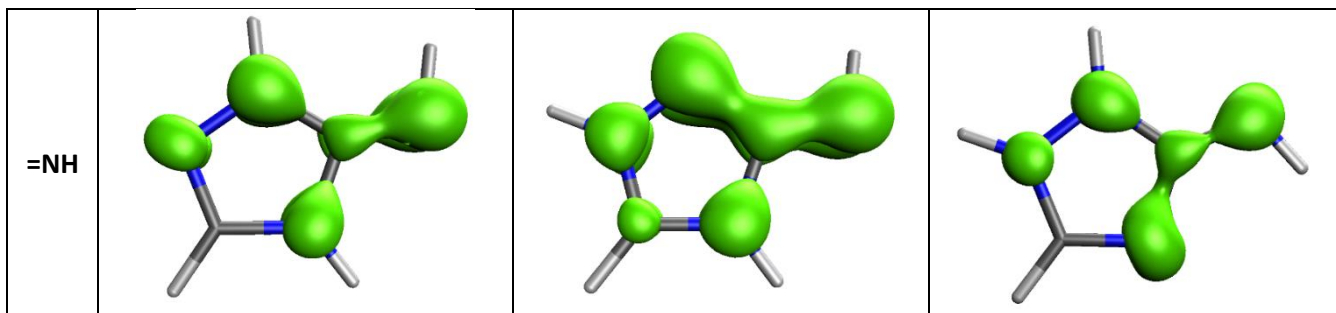

**Table S5.** Values of cSAR(X) for NO<sub>2</sub>, Cl and NH<sub>2</sub> substituents, the number of inductive and resonance interactions between substituent and endocyclic N atoms in each heterocycle and resonance structures associated with resonance effect of substituents.

|                   | indN <sup>a</sup> | resN <sup>b</sup> | indN_2 <sup>c</sup> | NO <sub>2</sub> | Cl     | NH <sub>2</sub> |
|-------------------|-------------------|-------------------|---------------------|-----------------|--------|-----------------|
| 1,2,4-triC5 (N1H) | 2o                | 1o<br>1p          | 1                   | 0.000           | 0.119  | 0.230           |
| 1,2,4-triC3 (N4H) | 2o                | 1o                | 1                   | -0.043          | 0.097  | 0.195           |
| 1,2,4-triC3 (N1H) | 2o                | 1o                | 1                   | -0.045          | 0.072  | 0.186           |
| imiC2             | 2o                | 1o                | 0                   | -0.056          | 0.079  | 0.182           |
| 1,2,3-triC5 (N1H) | 1o                | 1p                | 2                   | -0.101          | 0.033  | 0.135           |
| pyraC5            | 1o                | 1p                | 1                   | -0.112          | 0.024  | 0.126           |
| 1,2,3-triC4 (N2H) | 1o                | 1o                | 2                   | -0.118          | 0.003  | 0.115           |
| pyraC3            | 1o                | 1o                | 1                   | -0.128          | -0.007 | 0.104           |
| 1,2,3-triC4 (N1H) | 1o                | 0                 | 2                   | -0.140          | -0.016 | 0.092           |
| imiC4             | 1o                | 0                 | 1                   | -0.164          | -0.034 | 0.079           |
| imiC5             | 1o                | 0                 | 1                   | -0.164          | -0.014 | 0.062           |
| pyrrC2            | 1o                | 0                 | 0                   | -0.177          | -0.018 | 0.058           |
| pyraC4            | 0                 | 0                 | 2                   | -0.224          | -0.095 | 0.020           |
| pyrrC3            | 0                 | 0                 | 1                   | -0.216          | -0.103 | 0.012           |

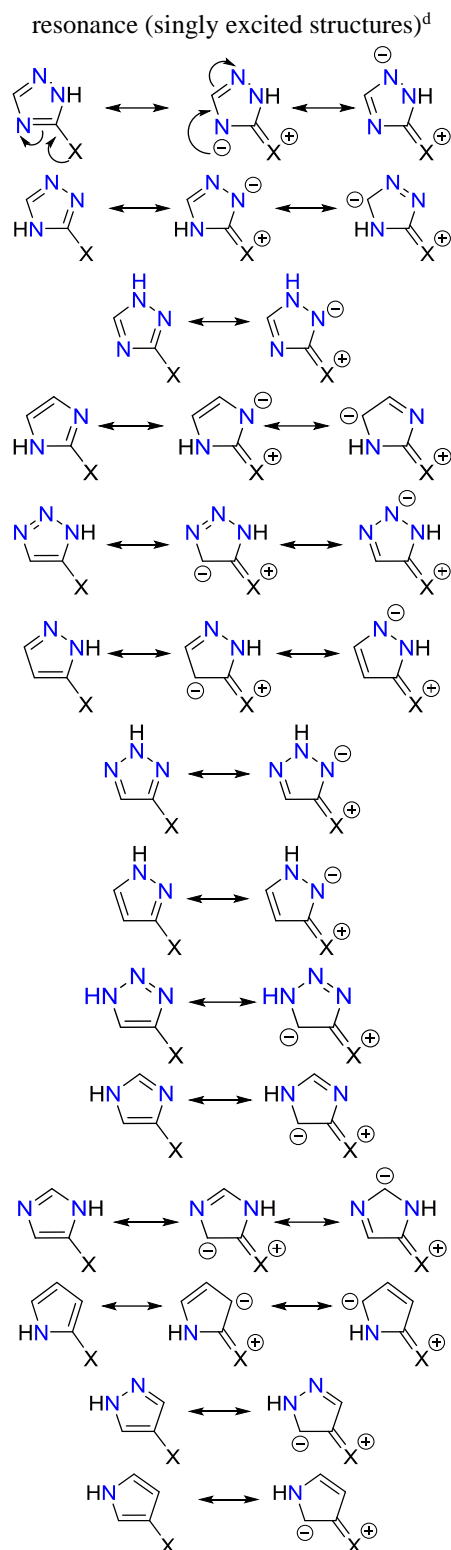

<sup>a</sup> indN – the number of endocyclic N atoms in *ortho* positions relative to substituent, 2o – grey shading of compound name, 1o – light grey shading, 0 – no shading.

<sup>b</sup> resN – the number of endocyclic N atoms interacting via resonance (singly excited structures) with substituent and their position relative to substituent: *o* – *ortho*, *p* – *para*.

<sup>c</sup> indN\_2 – the number of non-*ortho* endocyclic N atoms interacting via induction with substituent.

<sup>d</sup> electron-donating substituent delocalizes negative charge, electron-withdrawing positive; the structures look similar.

**Table S6.** Values of cSAR(X) of NO<sub>2</sub>, Cl and NH<sub>2</sub> substituents in derivatives of selected six-membered heterocycles. Data taken from *Molecules* **2021**, *26* (21), 6543.

|              |                                                                                     | NO <sub>2</sub> | Cl     | NH <sub>2</sub> |
|--------------|-------------------------------------------------------------------------------------|-----------------|--------|-----------------|
| triazine     | 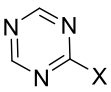   | 0.043           | 0.124  | 0.292           |
| pyrimidineC2 |    | 0.000           | 0.083  | 0.244           |
| pyrimidineC4 |    | -0.038          | 0.054  | 0.213           |
| pyrazine     |    | -0.065          | 0.031  | 0.181           |
| pyridineC2   |    | -0.078          | 0.016  | 0.163           |
| pyridineC4   |    | -0.097          | -0.004 | 0.140           |
| pyrimidineC5 |   | -0.118          | -0.020 | 0.113           |
| pyridineC3   |  | -0.128          | -0.030 | 0.103           |

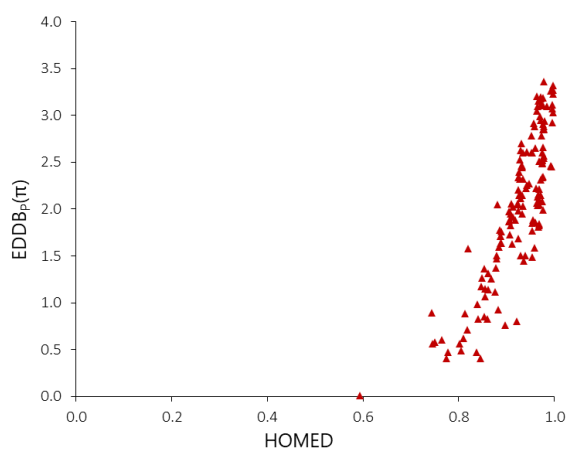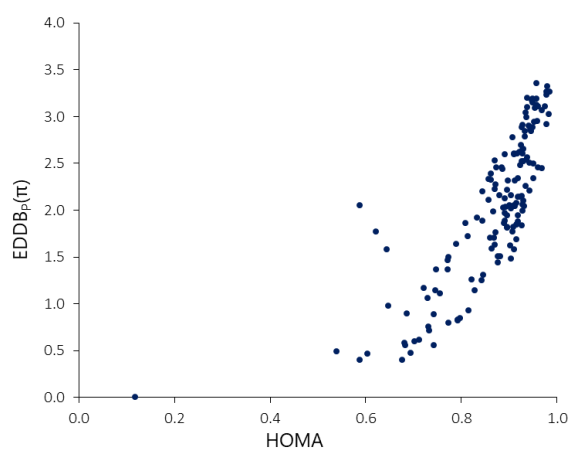

**Figure S6.** Relations between geometric aromaticity indices and the number of cyclically delocalized electrons from the EDDB<sub>p</sub>( $\pi$ ) function.



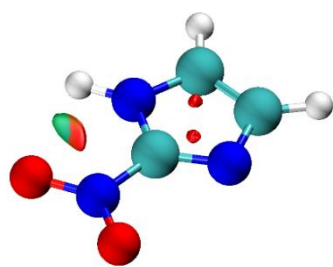

imiC2-NO2  
2.410 Å, 91.9 deg

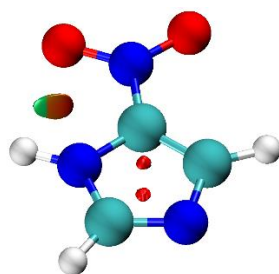

imiC5-NO2  
2.461 Å, 91.01 deg

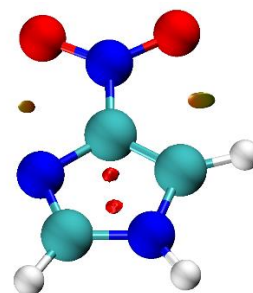

imiC4-NO2

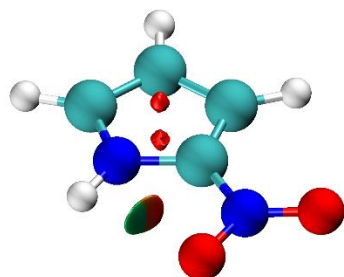

pyrrC2-NO2  
2.404 Å, 93.08 deg

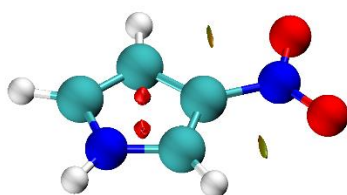

pyrrC3-NO2

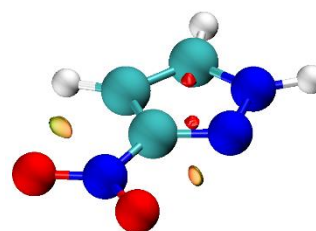

pyraC3-NO2

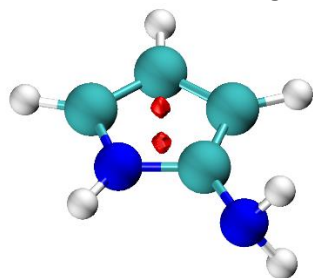

pyrrC2-NH2  
2.623 Å, 65.93 deg

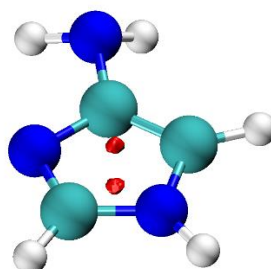

imiC4-NH2  
2.474 Å, 73.95 deg

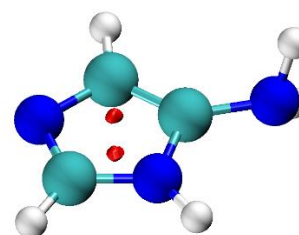

imiC5-NH2  
2.674 Å, 64.21 deg

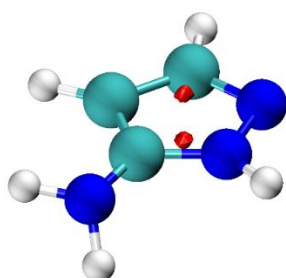

pyraC5-NH2  
2.700 Å, 61.72 deg

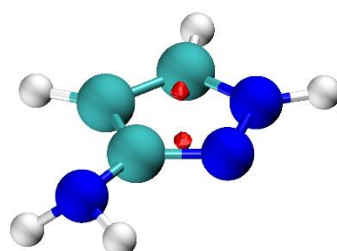

pyraC3-NH2  
2.467 Å, 72.56 deg

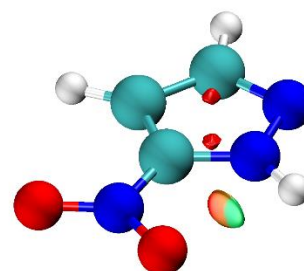

pyraC5-NO2  
2.481 Å, 89.44 deg

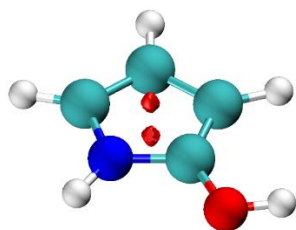

pyrrC2-OH  
2.575 Å, 64.33 deg

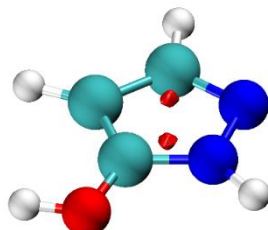

pyraC5-OH  
2.625 Å, 61.49 deg

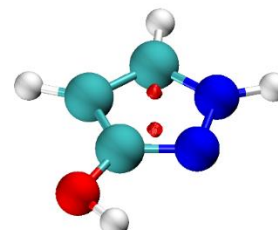

pyraC3-OH  
2.338 Å, 78.02 deg

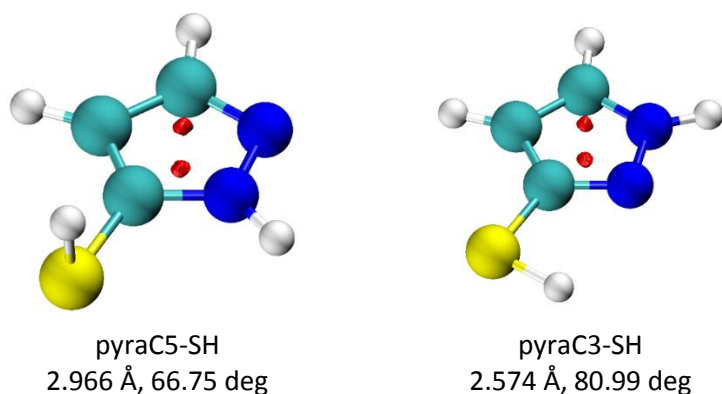

**Figure S7.** Non covalent interaction analysis (NCI method). Reduced density gradient isosurfaces (RDG = 0.5), colored according to the value of  $\text{sgn}(\lambda_2(r)) \cdot \rho(r)$ . Distances and angles of DH...A *ortho* contacts (D = N,O,S; A = N,O).

**Table S7.** Keto, thioketo and imino forms of studied 5-membered heterocycles with their  $\text{EDDB}_p(\pi)$ ,  $\text{cSAR}(X)$ , HOMED, CX bond lengths ( $d_{\text{CX}}$ ) and  $\Delta E$  values (in kcal/mol).

|                          | ← cyclic $\pi$ -electron delocalization |        |        |        |        |        |        |        |        |        |
|--------------------------|-----------------------------------------|--------|--------|--------|--------|--------|--------|--------|--------|--------|
|                          |                                         |        |        |        |        |        |        |        |        |        |
| $\text{EDDB}_p(\pi)$     | 2.050                                   | 1.581  | 1.365  | 0.896  | 0.713  | 0.605  | 0.564  | 0.491  | 0.474  | 0.471  |
| HOMED                    | 0.881                                   | 0.820  | 0.853  | 0.744  | 0.818  | 0.764  | 0.745  | 0.805  | 0.778  | 0.838  |
| $\text{cSAR}(X)$         | -0.416                                  | -0.322 | -0.272 | -0.306 | -0.165 | -0.183 | -0.221 | -0.237 | -0.167 | -0.223 |
| $d_{\text{CX}}/\text{Å}$ | 1.241                                   | 1.223  | 1.223  | 1.228  | 1.214  | 1.218  | 1.215  | 1.223  | 1.210  | 1.220  |
| $\Delta E^a$             | 33.8                                    | 45.6   | 15.9   | 7.7    | -6.8   | -9.0   | 15.6   | 12.5   | 13.5   | 15.9   |
|                          | thioketo forms (=S)                     |        |        |        |        |        |        |        |        |        |
| $\text{EDDB}_p(\pi)$     | 2.225                                   | 2.203  | 2.222  | 1.310  | 0.930  | 0.831  | 0.853  | 0.762  | 0.825  | 0.803  |
| HOMED                    | 0.961                                   | 0.924  | 0.940  | 0.862  | 0.882  | 0.840  | 0.854  | 0.897  | 0.860  | 0.921  |
| $\text{cSAR}(X)$         | -0.564                                  | -0.450 | -0.389 | -0.444 | -0.253 | -0.283 | -0.333 | -0.340 | -0.256 | -0.316 |
| $d_{\text{CX}}/\text{Å}$ | 1.698                                   | 1.673  | 1.668  | 1.679  | 1.653  | 1.662  | 1.662  | 1.666  | 1.650  | 1.660  |
| $\Delta E^b$             | 35.3                                    | 38.8   | 9.7    | 11.1   | -6.6   | -8.3   | 14.7   | 14.0   | 16.2   | 17.1   |
|                          | imino forms (=NH)                       |        |        |        |        |        |        |        |        |        |
| $\text{EDDB}_p(\pi)$     | 1.775                                   | 0.982  | 1.113  | 0.889  | 0.619  | 0.583  | 0.562  | 0.011  | 0.403  | 0.406  |
| HOMED                    | 0.886                                   | 0.838  | 0.877  | 0.813  | 0.810  | 0.749  | 0.802  | 0.593  | 0.773  | 0.845  |
| $\text{cSAR}(X)$         | -0.391                                  | -0.279 | -0.241 | -0.281 | -0.130 | -0.150 | -0.197 | -0.135 | -0.137 | -0.188 |
| $d_{\text{CX}}/\text{Å}$ | 1.309                                   | 1.293  | 1.291  | 1.298  | 1.281  | 1.285  | 1.285  | 1.281  | 1.277  | 1.288  |
| $\Delta E^c$             | 55.7                                    | 65.0   | 36.6   | 30.9   | 13.4   | 11.0   | 34.7   | 22.9   | 30.4   | 34.0   |

a – the energy of keto form relative to the enol form; b – the energy of thioketo form relative to the thiol form; c – the energy of imino form relative to the amino form.

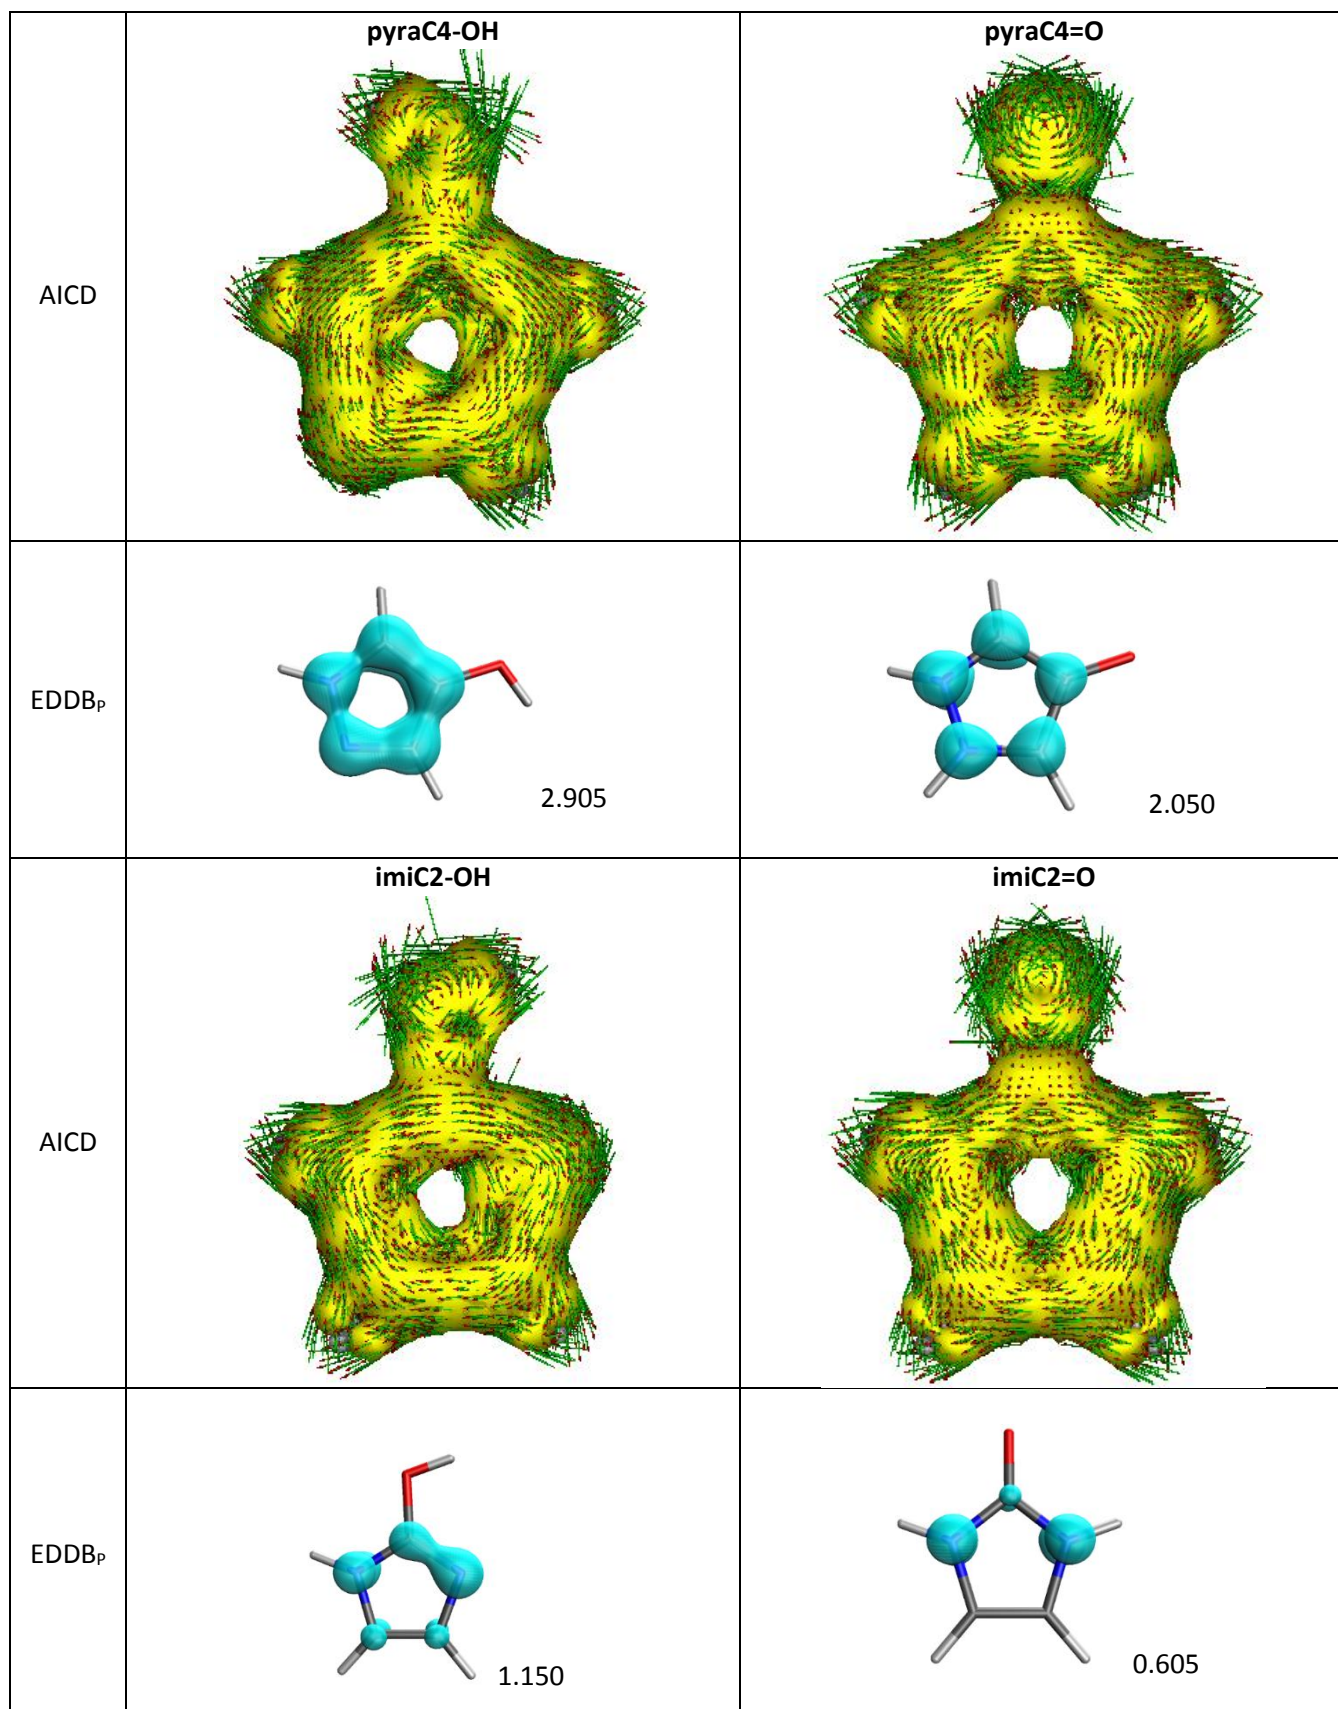

**Figure S8.** Anisotropy of the induced current density (AICD) plots (isosurface=0.03) and EDDB<sub>p</sub> isosurfaces (0.02) with corresponding populations of cyclically delocalized electrons for enol and keto forms of substituted imidazole and pyrazole.

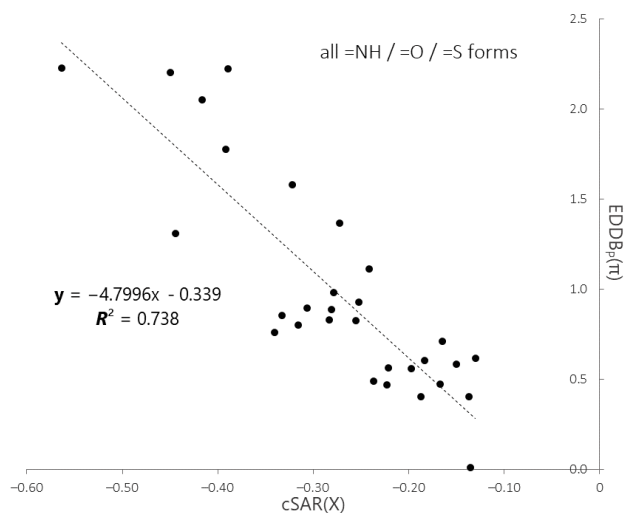

**Figure S9.** Correlation between the number of cyclically delocalized electrons and electron withdrawing properties of =NH/=O/=S groups for all studied heterocycles.

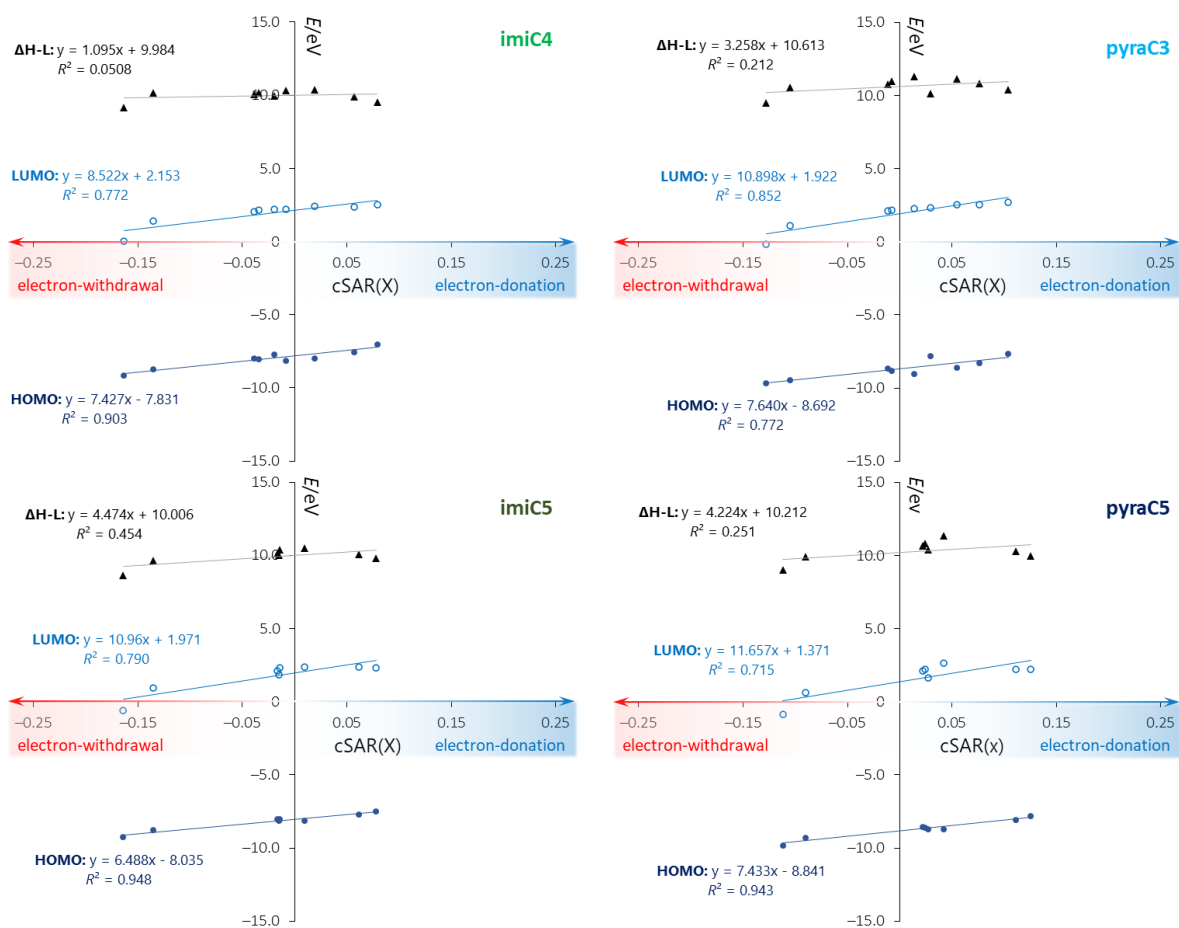

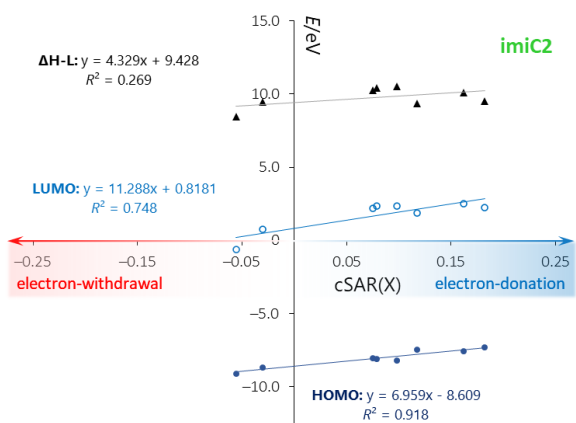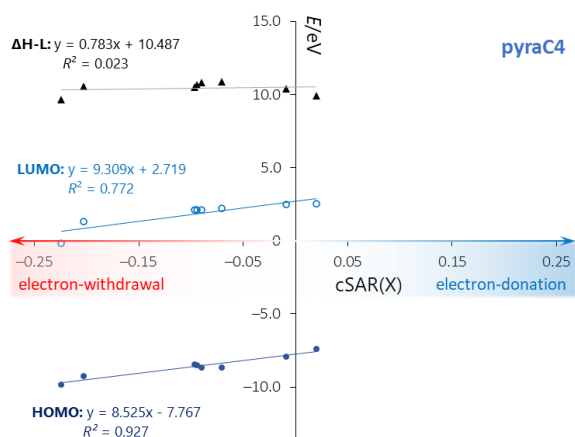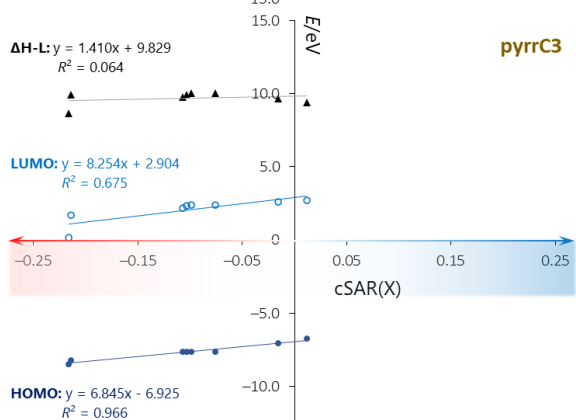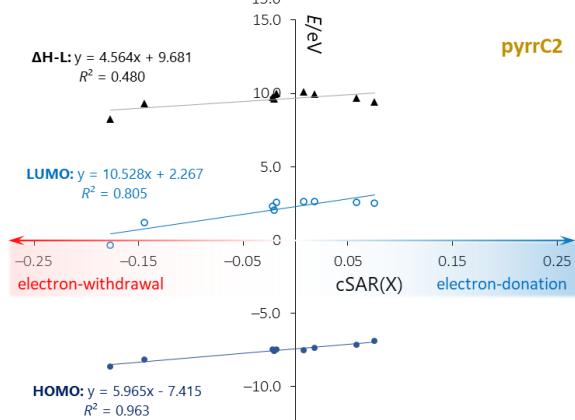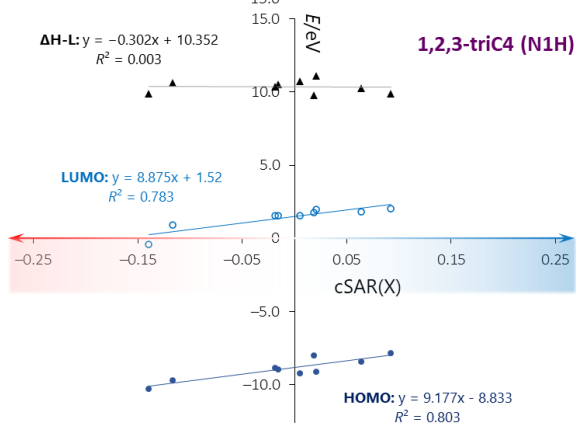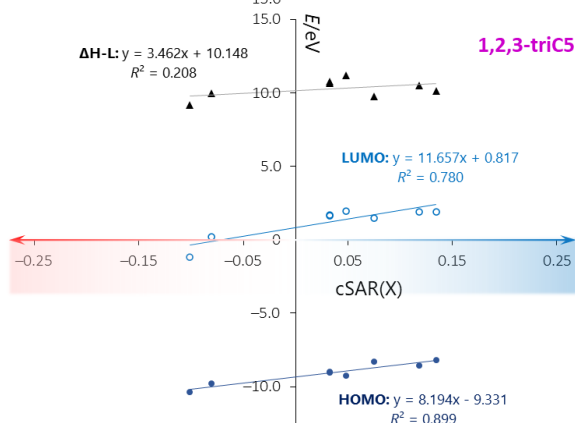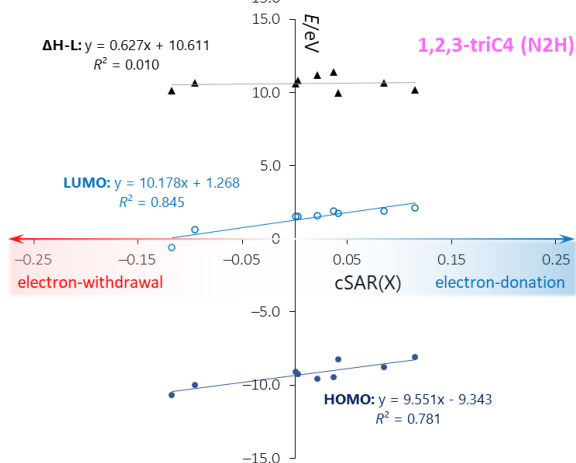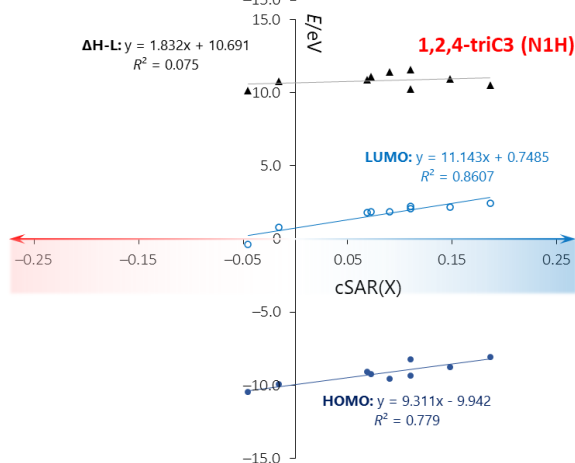

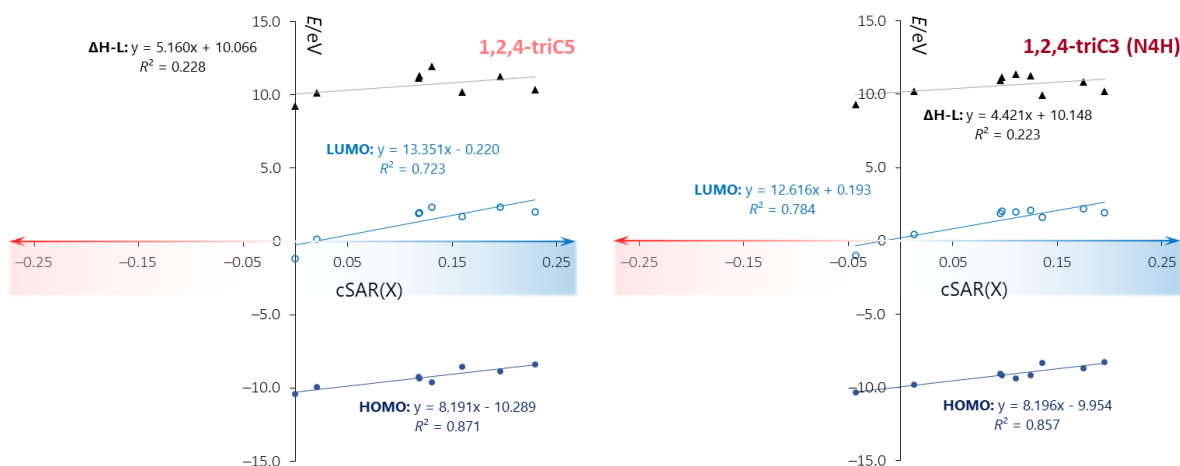

**Figure S10.** Energies of HOMO, LUMO and the HOMO-LUMO gap ( $\Delta H-L$ ) as a function of  $cSAR(X)$ .

**Table S8.** Summary of slopes from Figure S9.

|                  | HOMO  | LUMO   |
|------------------|-------|--------|
| 1,2,4-triC3(N1H) | 9.311 | 11.143 |
| 1,2,3-triC4(N1H) | 9.177 | 8.875  |
| pyraC4           | 8.525 | 9.309  |
| 1,2,3-triC4(N2H) | 8.466 | 6.861  |
| 1,2,3-triC5(N1H) | 8.194 | 11.657 |
| 1,2,4-triC5(N1H) | 8.191 | 13.351 |
| 1,2,4-triC3(N4H) | 8.034 | 7.678  |
| pyraC3           | 7.640 | 10.898 |
| imiC4            | 7.427 | 8.522  |
| pyrrC3           | 6.844 | 8.254  |
| imiC5            | 6.488 | 10.962 |
| pyrrC2           | 5.965 | 10.528 |
| pyraC5           | 5.951 | 4.627  |
| imiC2            | 5.495 | 11.288 |

**Table S9.** Reference bonds lengths ( $\text{\AA}$ ) calculated at revDSD-PBEP86-G3BJ/def2-TZVPP level of theory and values of HOMED normalization constants  $\alpha$ .

| HOMED | $d_s$                                                                                         | $d_d$                                                                                         | $d_o$                                                                                                            | $\alpha$ |
|-------|-----------------------------------------------------------------------------------------------|-----------------------------------------------------------------------------------------------|------------------------------------------------------------------------------------------------------------------|----------|
| CC    | 1.5266<br>ethane                                                                              | 1.3312<br>ethene                                                                              | 1.3936<br>benzene                                                                                                | 82.226   |
| CN    | 1.4643<br>methyamine                                                                          | 1.2709<br>methylimine                                                                         | 1.3337<br>triazine                                                                                               | 84.611   |
| NN    | 1.4687<br>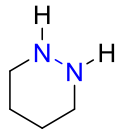 | 1.2399<br> | 1.3175<br><br>D6 <sub>h</sub> | 62.022   |

**Table S10.** AICD plots (isosurface = 0.03) of selected substituted and unsubstituted systems.

|                                                                                                         |                                                                                                          |
|---------------------------------------------------------------------------------------------------------|----------------------------------------------------------------------------------------------------------|
| pyrrole<br>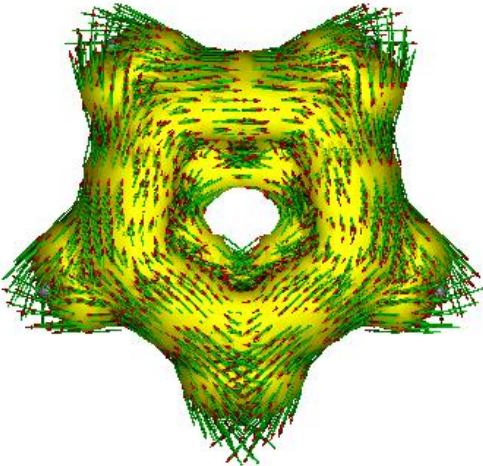            | imidazole<br>          |
| pyrazole<br>         | 123-triazole N1H<br> |
| 123-triazole N2H<br> | 124-triazole N1H<br> |

|                                                                                    |                                                                                     |
|------------------------------------------------------------------------------------|-------------------------------------------------------------------------------------|
| 124-triazole N4H                                                                   | tetrazole-N1H                                                                       |
| 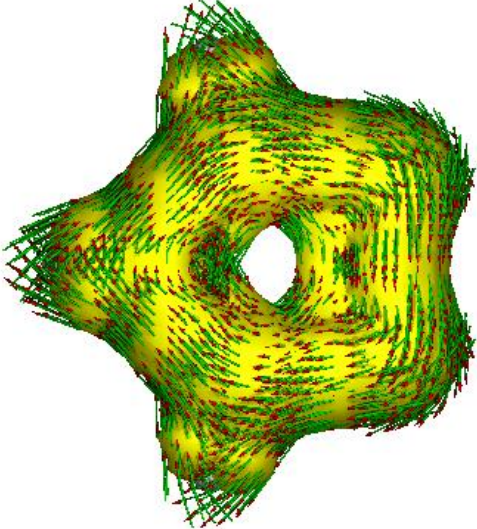  |   |
| tetrazole-N2H                                                                      | imiC2-CN                                                                            |
|  |  |
| imiC2-NO <sub>2</sub>                                                              | imiC2-Cl                                                                            |



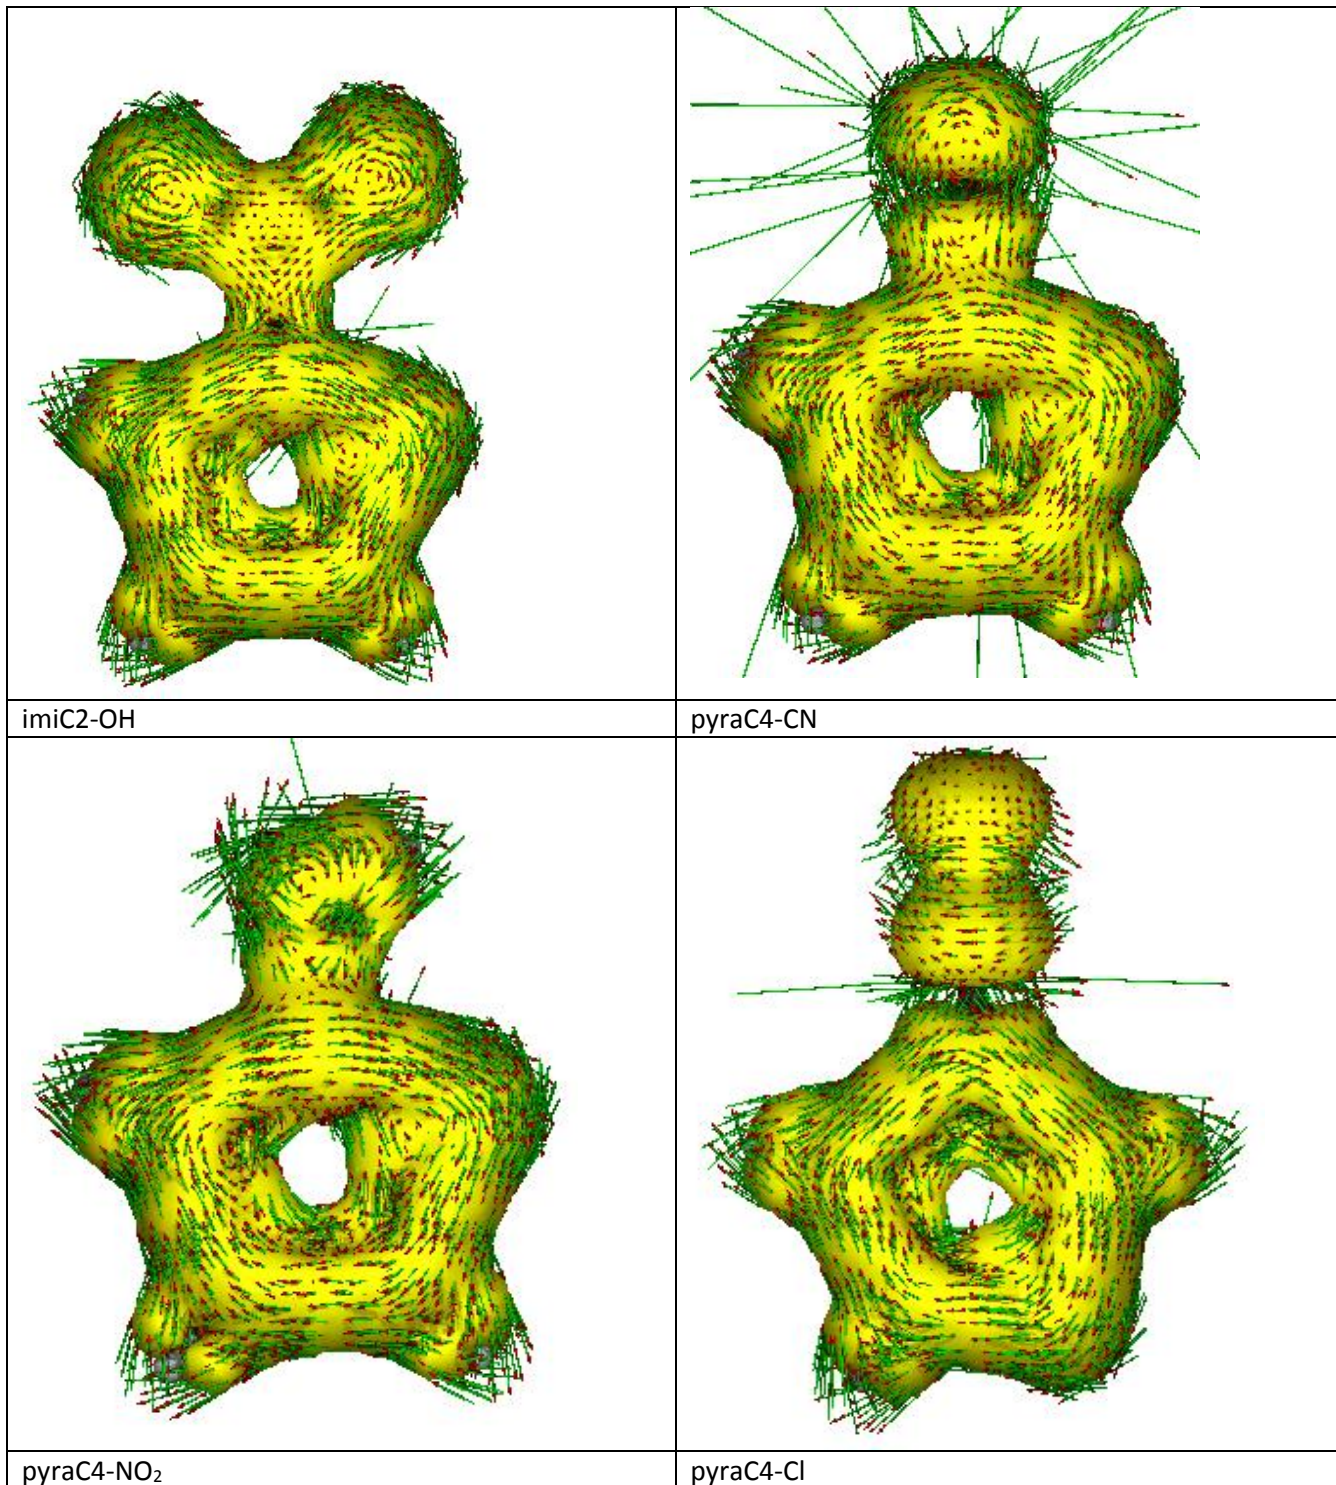

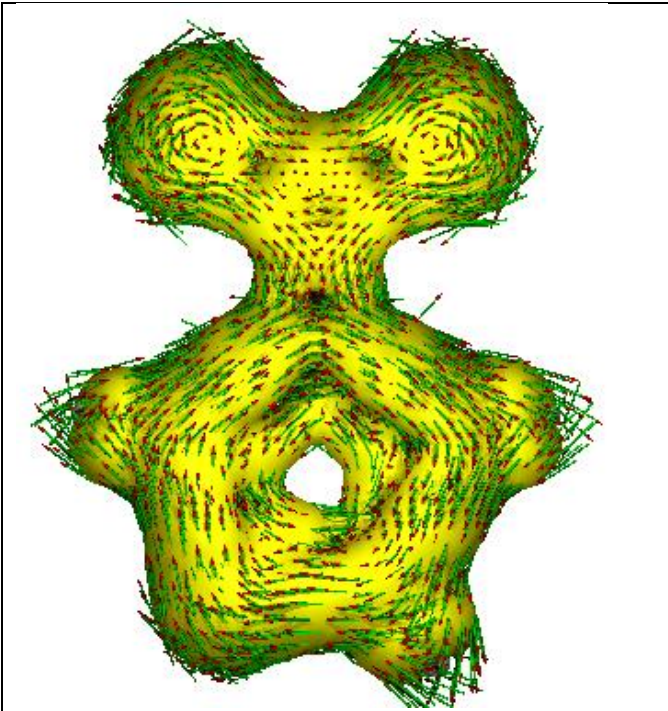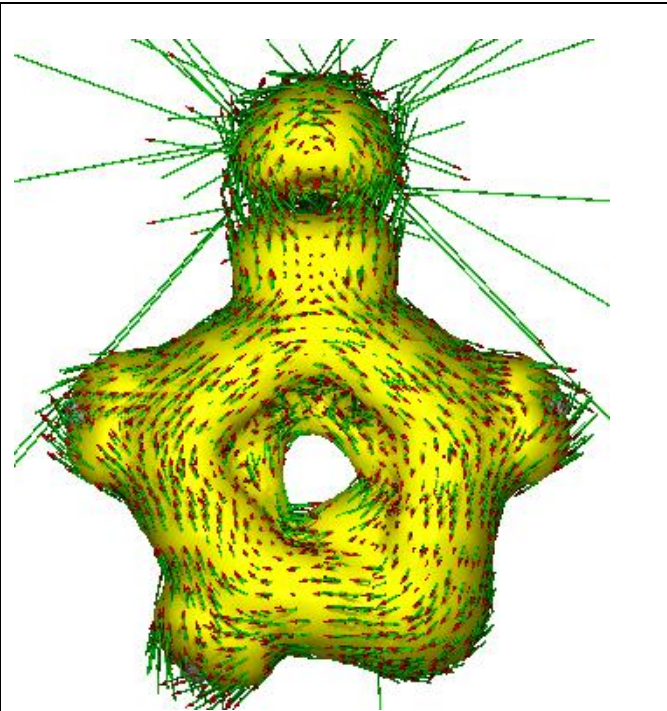

pyraC4-OH

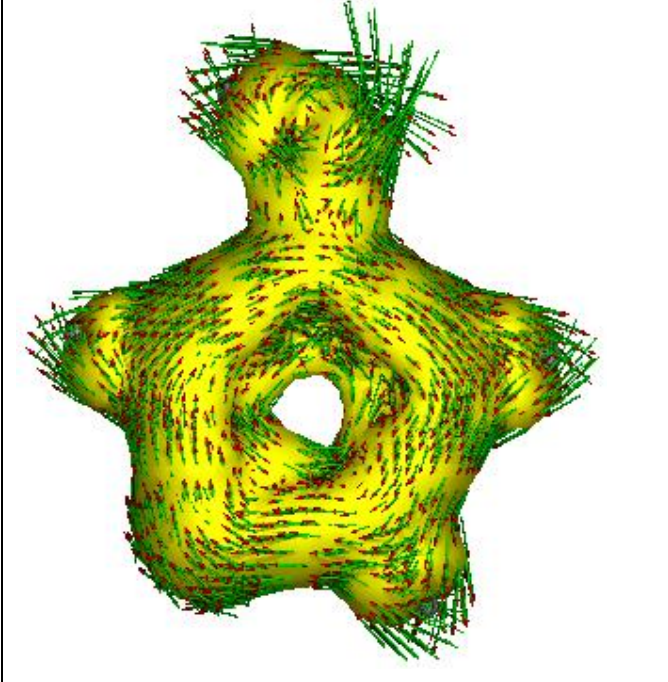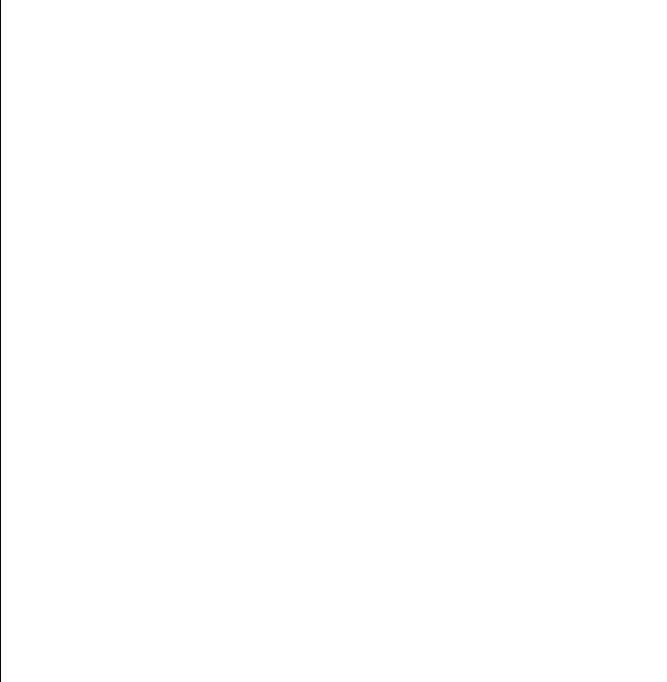

Supplement: d4cp01709a1.pdf [file d4cp01709a1.pdf]
